# Supplementary material for: Synthesis, Structural Characterization and Anticancer Activity of New 5-Trifluoromethyl-2-thioxo-thiazolo[4,5-d]pyrimidine Derivatives
Source: MDPI journal article supplement (doi:10.3390/ph15010092), 2022-01-13
Supplement: s1 [file s1]

# Synthesis, Structural Characterization and Anticancer Activity of New 5-trifluoromethyl-2-thioxo-thiazolo[4,5-*d*]pyrimidine derivatives

Lilianna Becan <sup>1,\*</sup>, Anna Pyra <sup>2</sup>, Nina Rembiałkowska <sup>3</sup> and Iwona Bryndal <sup>1,\*</sup>

## Table of contents

|                                                                                                                                                                                                                                                                                             |         |
|---------------------------------------------------------------------------------------------------------------------------------------------------------------------------------------------------------------------------------------------------------------------------------------------|---------|
| <b>Figures S1-S15.</b> <sup>1</sup> H NMR spectra of compounds <b>1c</b> , <b>1d</b> , <b>2a-2e</b> , <b>3a-e</b> , <b>4a-c</b> .....                                                                                                                                                       | S2-S9   |
| <b>Figures S16-S28.</b> <sup>13</sup> C NMR spectra of compounds <b>2a-2e</b> , <b>3a-e</b> , <b>4a-c</b> .....                                                                                                                                                                             | S9-S15  |
| <b>Figures S29-S41.</b> MS spectra of compounds <b>2a-2e</b> , <b>3a-e</b> , <b>4a-c</b> .....                                                                                                                                                                                              | S16-S20 |
| <b>Figures S42-S54.</b> IR spectra of compounds <b>2a-2e</b> , <b>3a-e</b> , <b>4a-c</b> .....                                                                                                                                                                                              | S20-S26 |
| <b>Figure S55.</b> The crystal packing of the <b>2e</b> viewed along a axis. Disordered toluene molecules are marked with a purple wire/stick model. Dashed lines (in black) indicate intermolecular interactions, with N—H···O in black, C—H···S in orange and C—H···F in light green..... | S27     |
| <b>Table S1.</b> Selected X-ray single-crystal data and structure refinement details of compounds <b>2e</b> and <b>4b</b> .....                                                                                                                                                             | S28     |

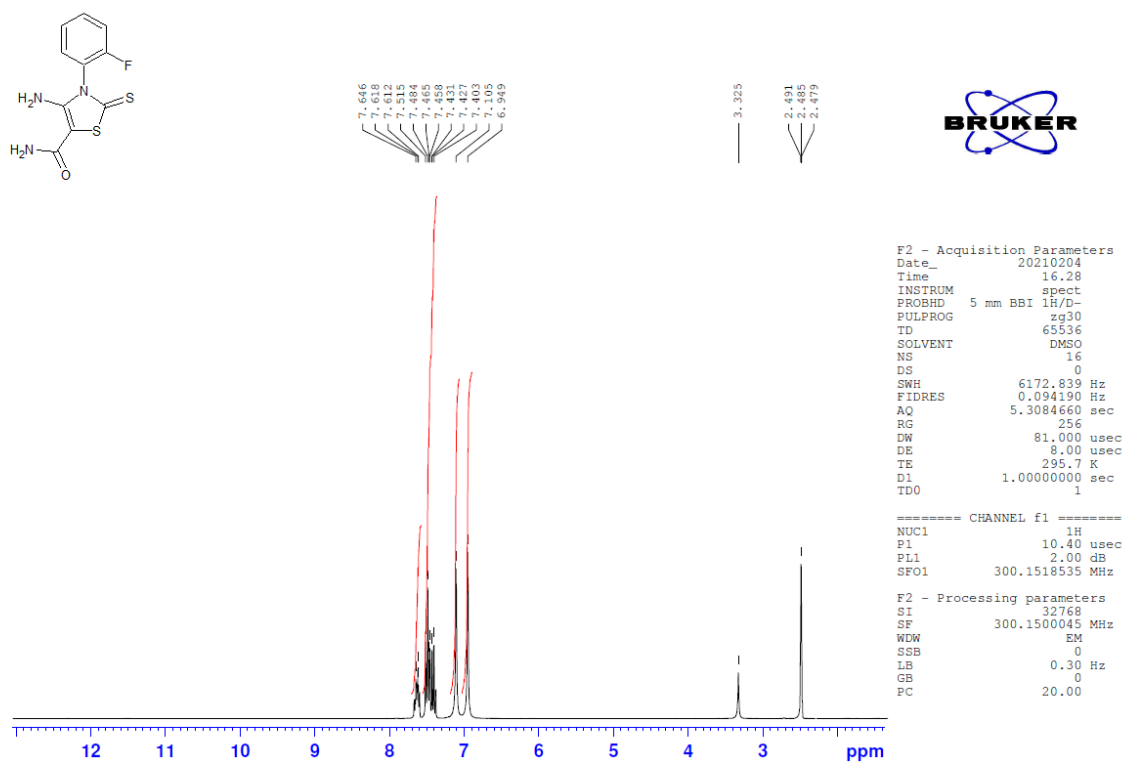

**Figure S1.** <sup>1</sup>HNMR spectrum of compound **1c** (300MHz, DMSO).

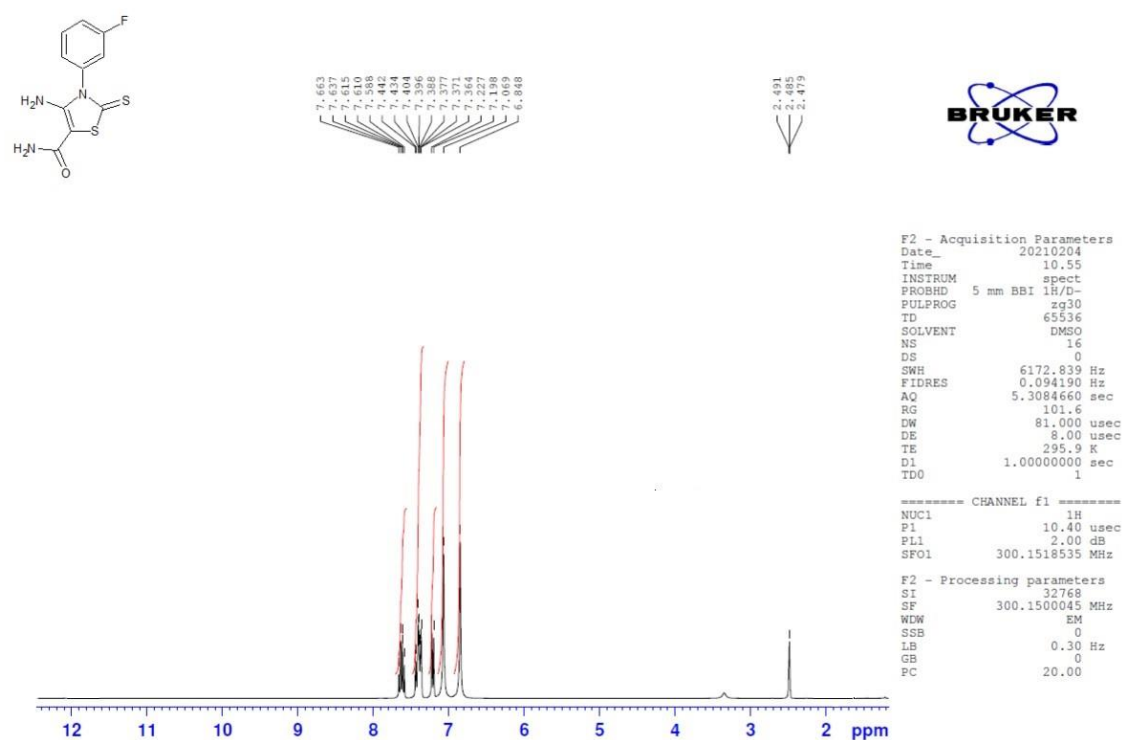

**Figure S2.** <sup>1</sup>HNMR spectrum of compound **1d** (300MHz, DMSO).

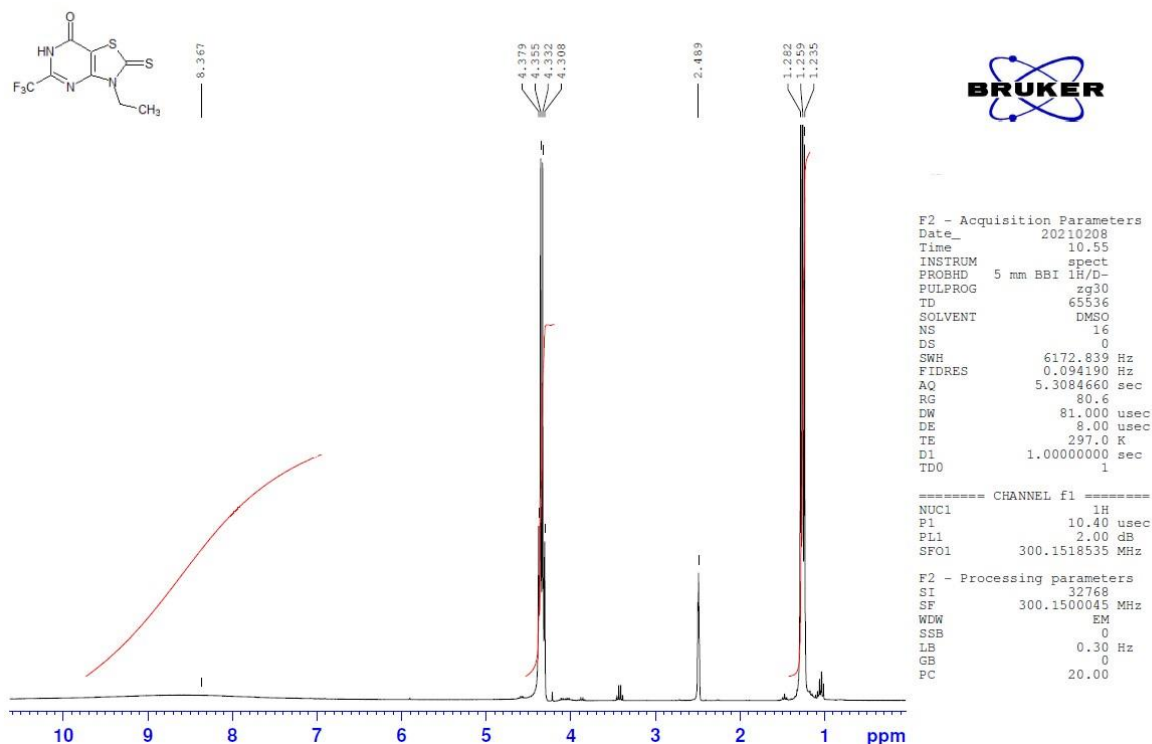

**Figure S3.**  $^1\text{H}$ NMR spectrum of compound **2a** (300MHz, DMSO).

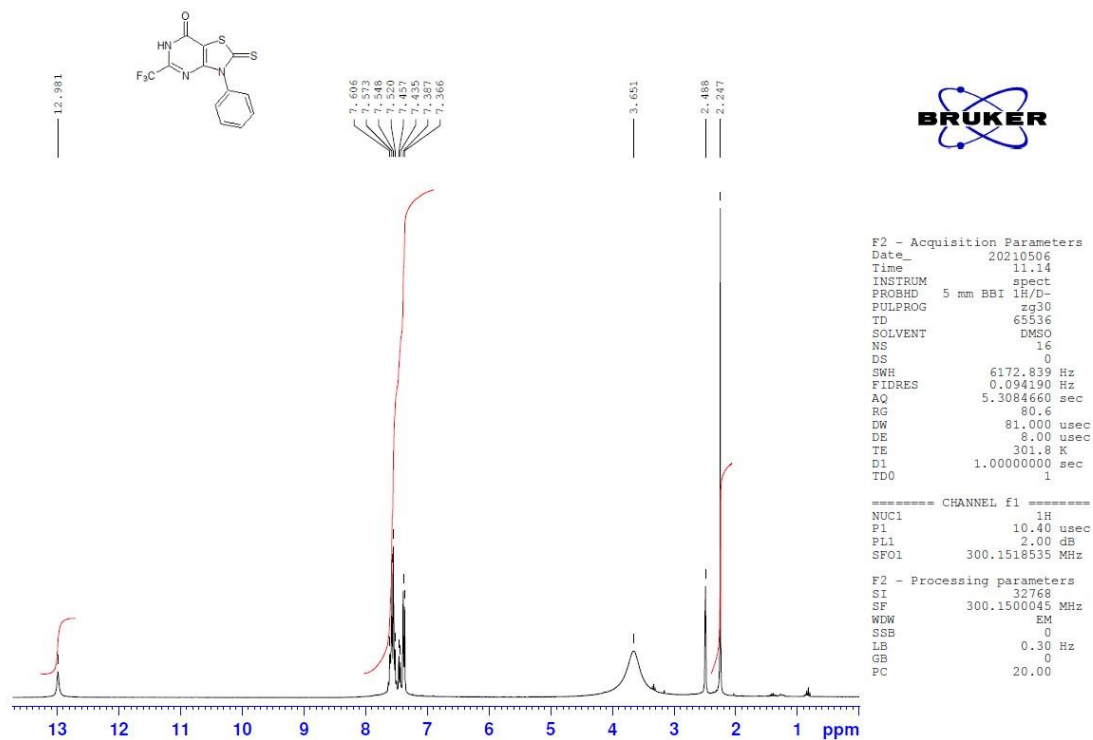

**Figure S4.**  $^1\text{H}$ NMR spectrum of compound **2b** (300MHz, DMSO).

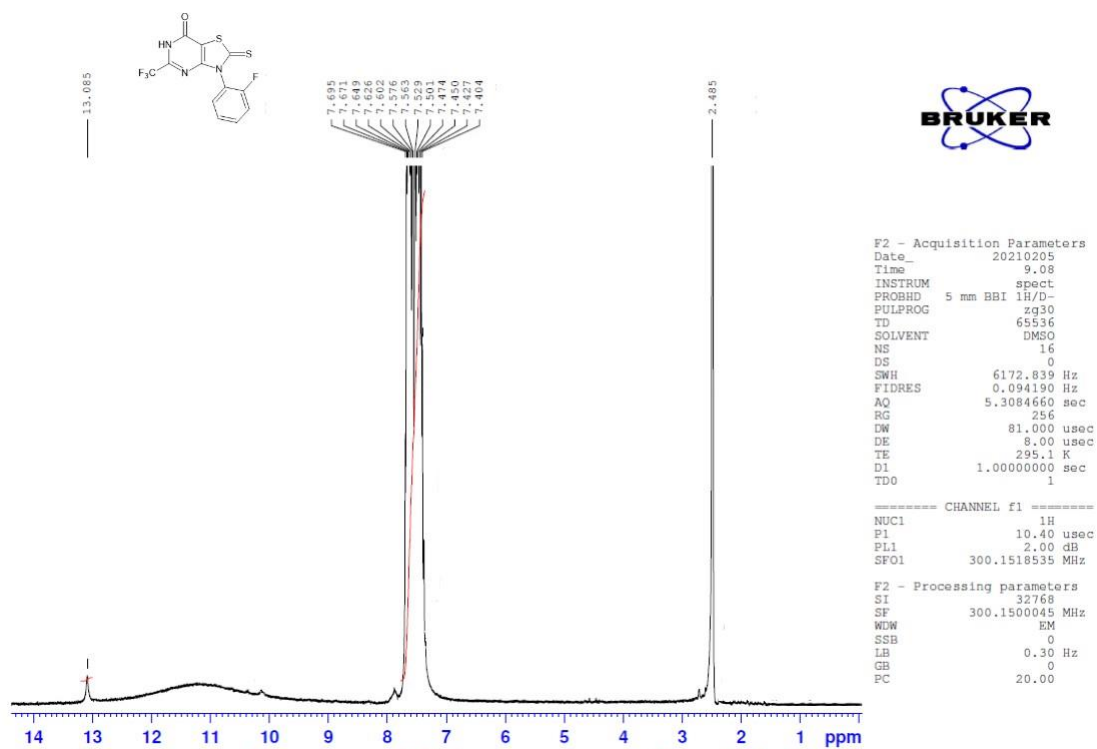

Figure S5. <sup>1</sup>H NMR spectrum of compound **2c** (300MHz, DMSO).

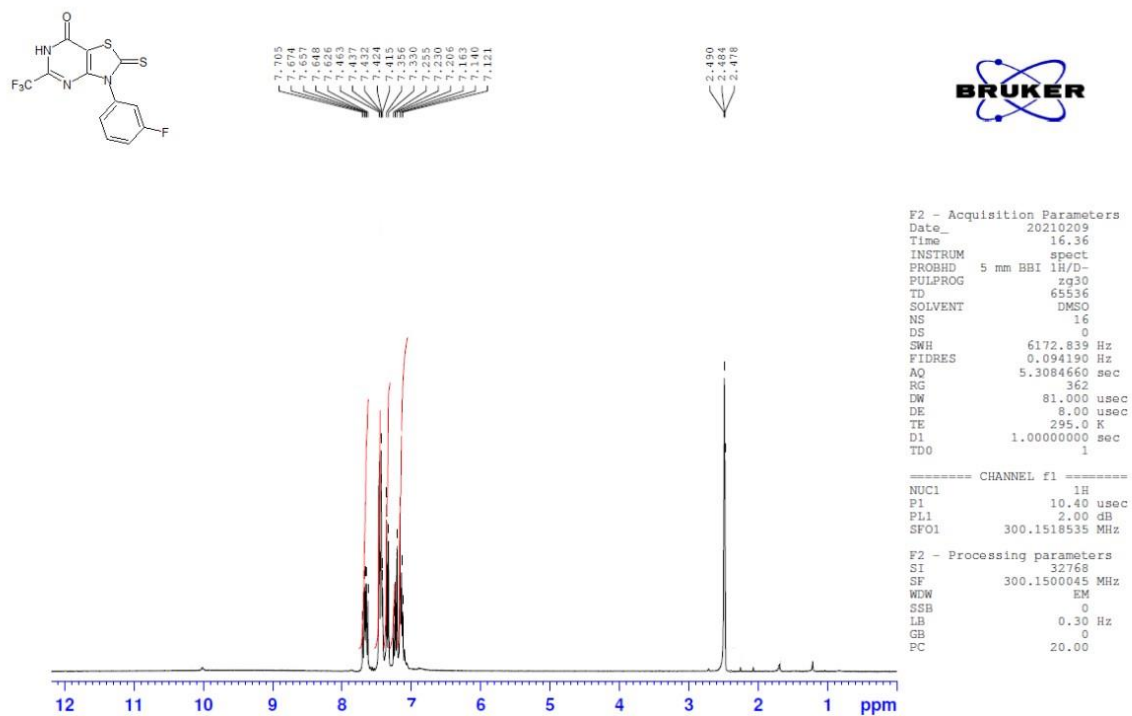

Figure S6. <sup>1</sup>H NMR spectrum of compound **2d** (300MHz, DMSO).

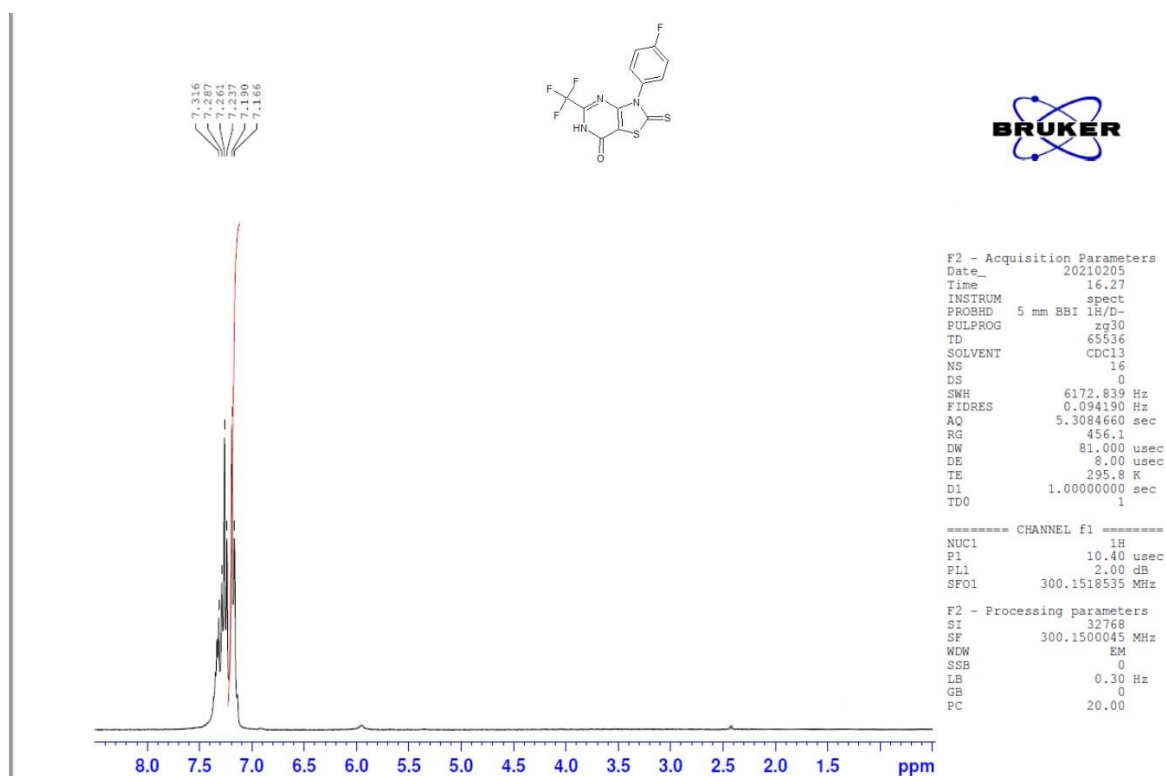

**Figure S7.** <sup>1</sup>H NMR spectrum of compound **2e** (300 MHz, CDCl<sub>3</sub>).

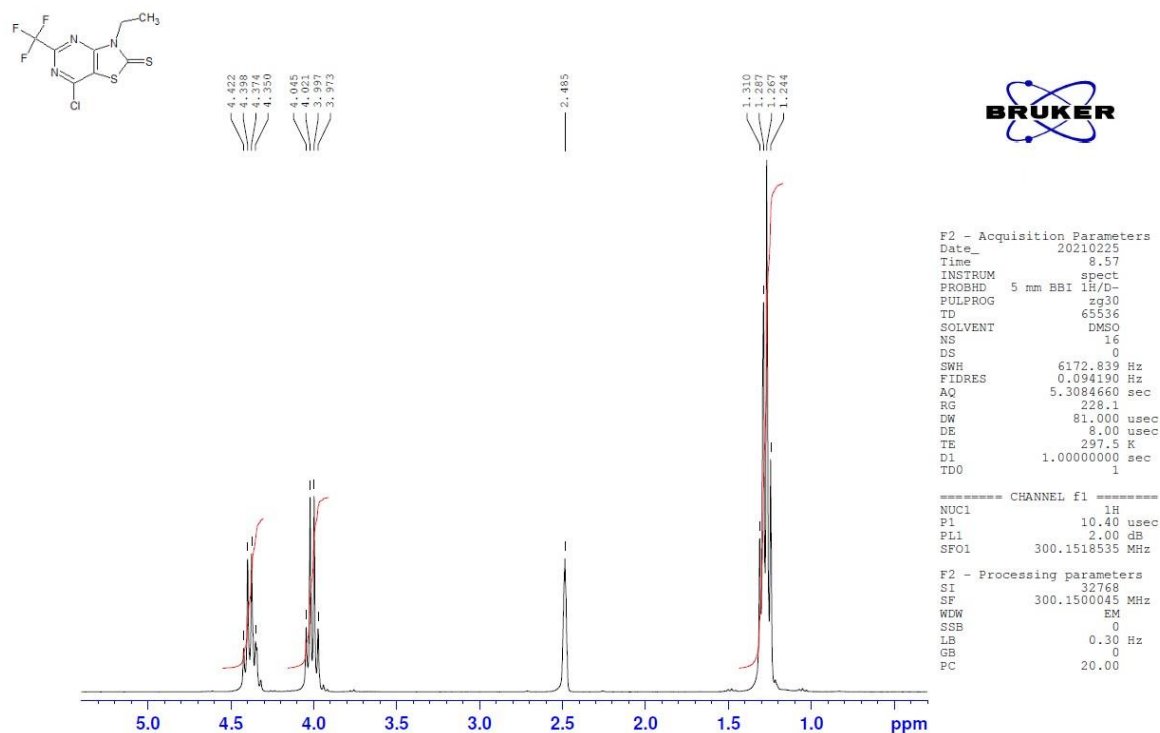

**Figure S8.** <sup>1</sup>H NMR spectrum of compound **3a** (300 MHz, DMSO).

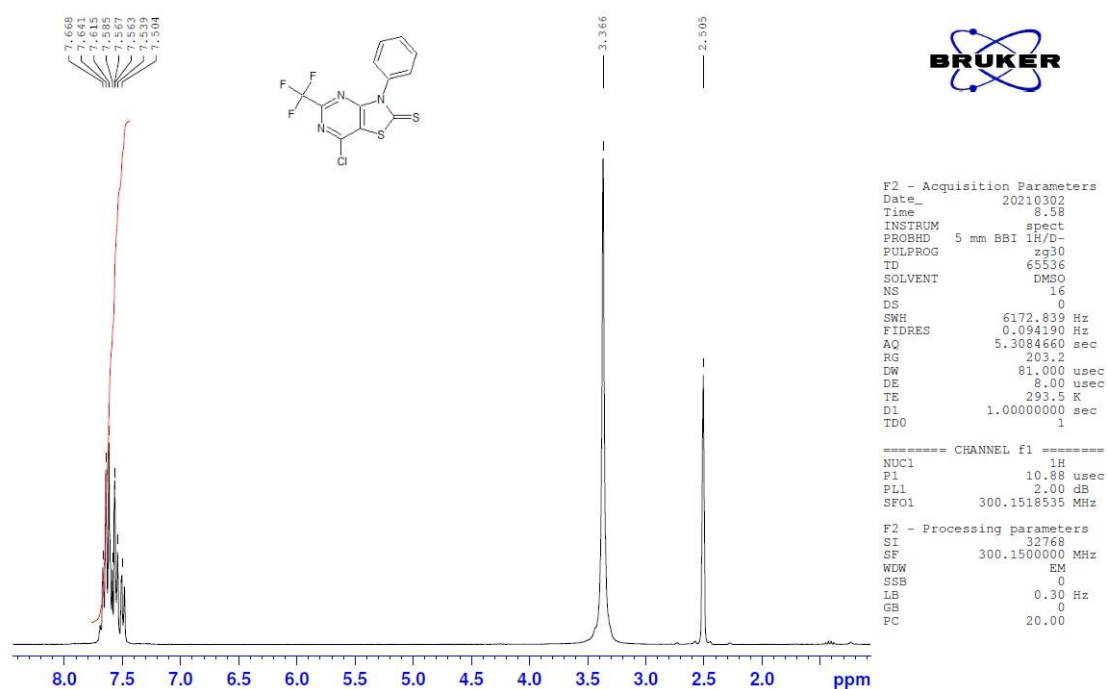

**Figure S9.**  $^1\text{H}$ NMR spectrum of compound **3b** (300MHz, DMSO).

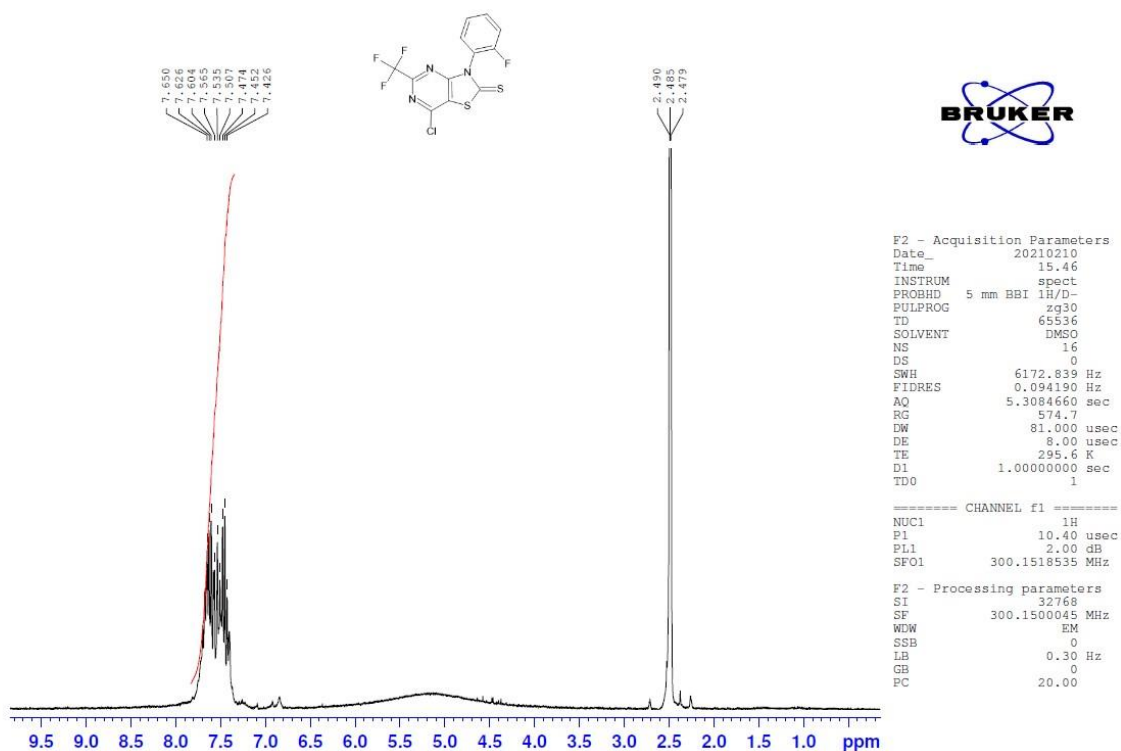

**Figure S10.**  $^1\text{H}$ NMR spectrum of compound **3c** (300MHz, DMSO).

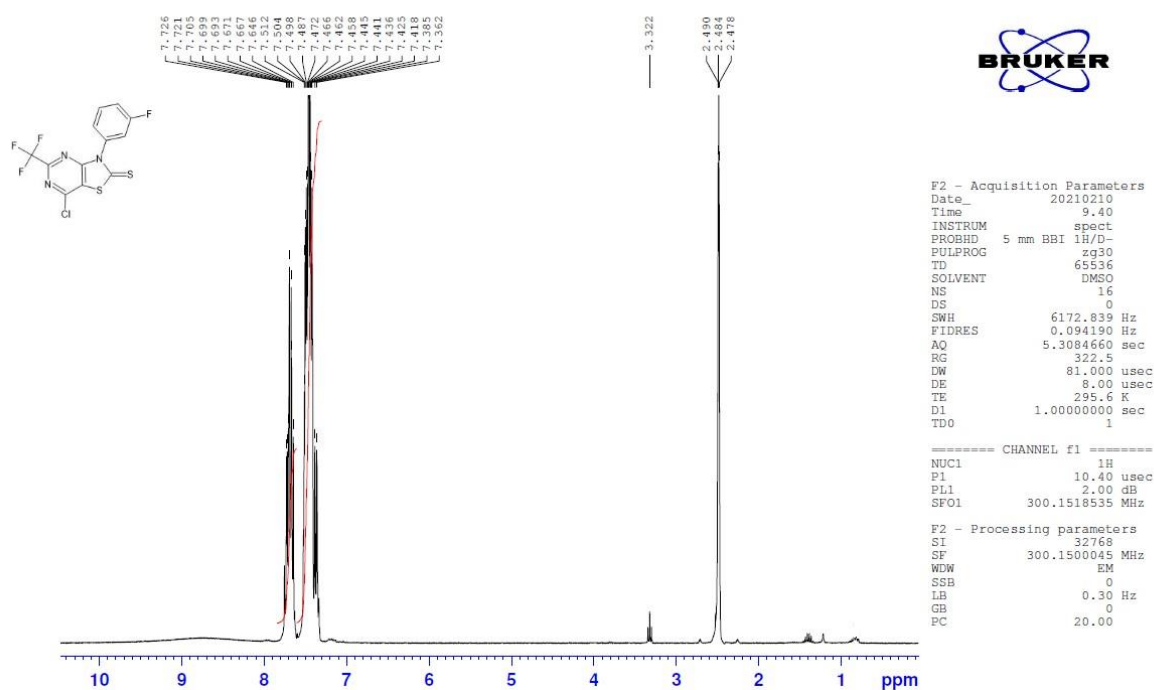

**Figure S11.** <sup>1</sup>HNMR spectrum of compound **3d** (300MHz, DMSO).

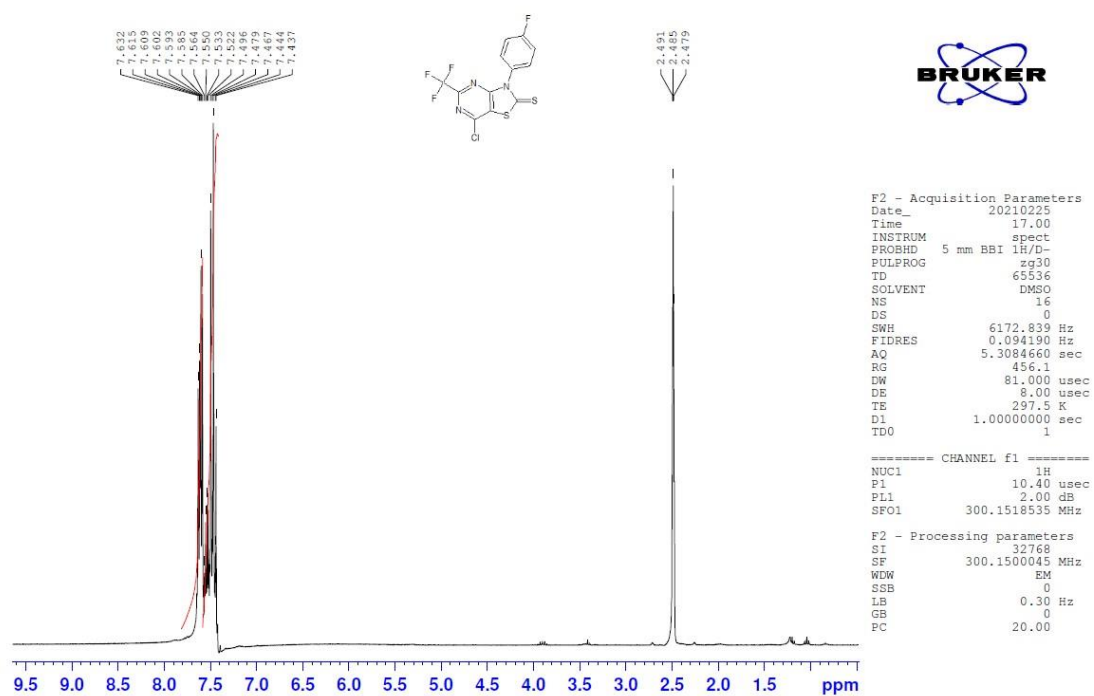

**Figure S12.** <sup>1</sup>HNMR spectrum of compound **3e** (300MHz, DMSO).

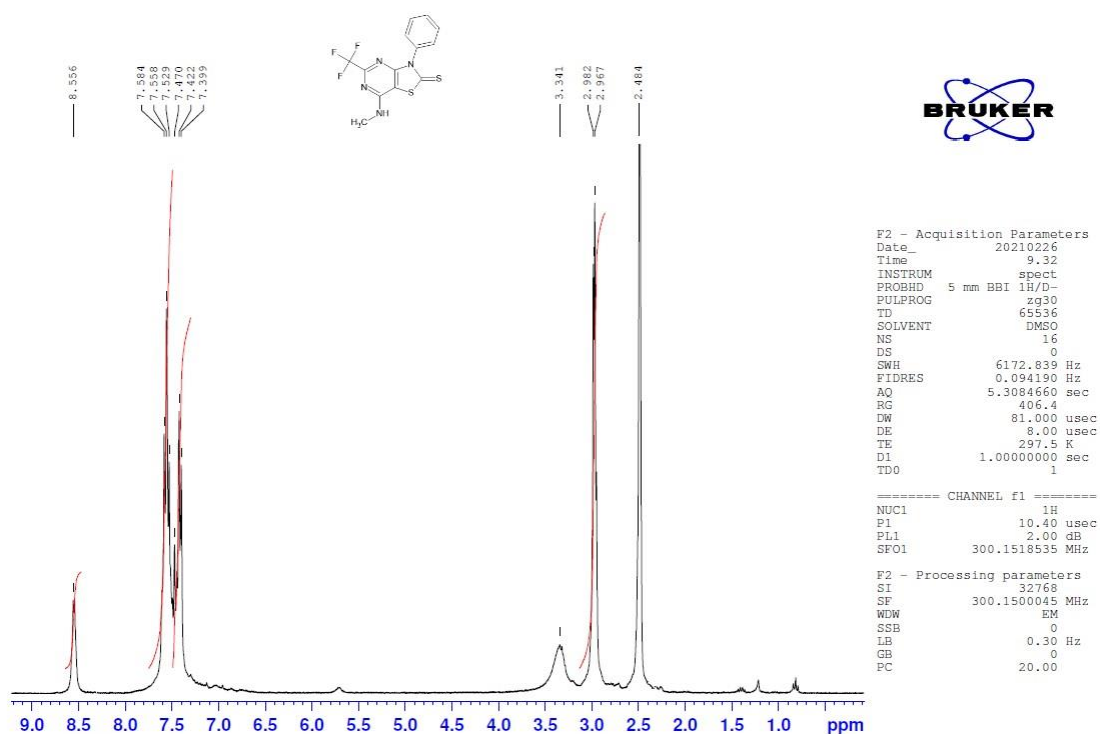

**Figure S13.**  $^1\text{H}$ NMR spectrum of compound **4a** (300MHz, DMSO).

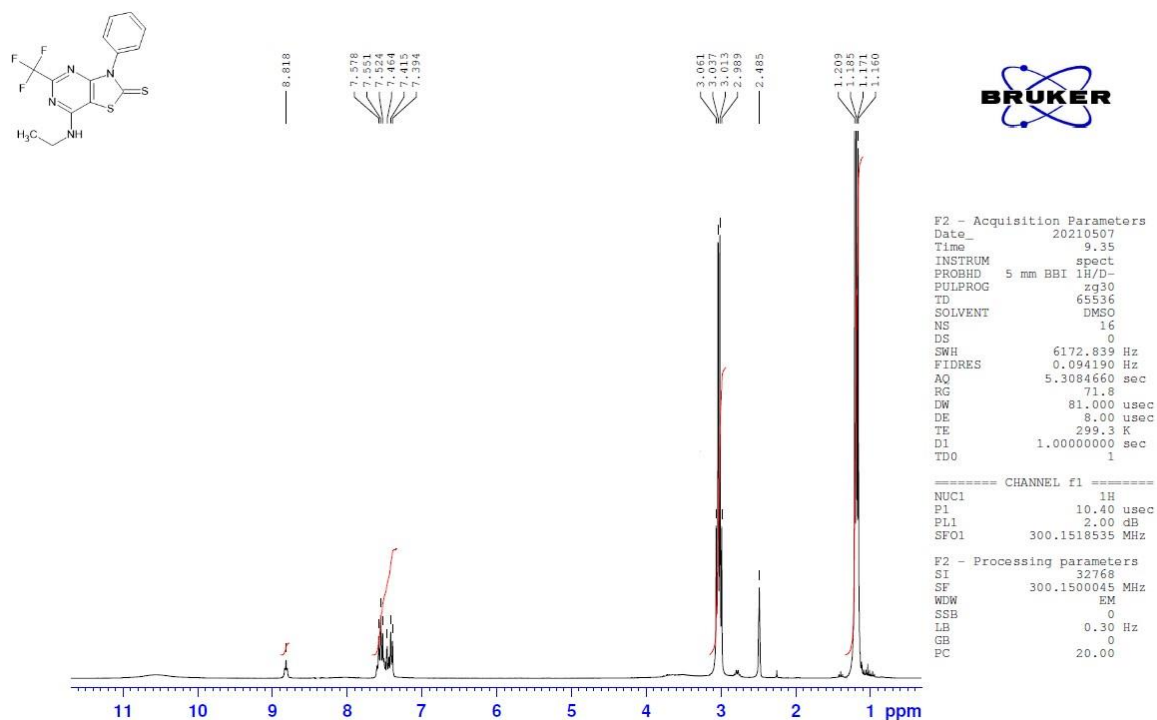

**Figure S14.**  $^1\text{H}$ NMR spectrum of compound **4b** (300MHz, DMSO).





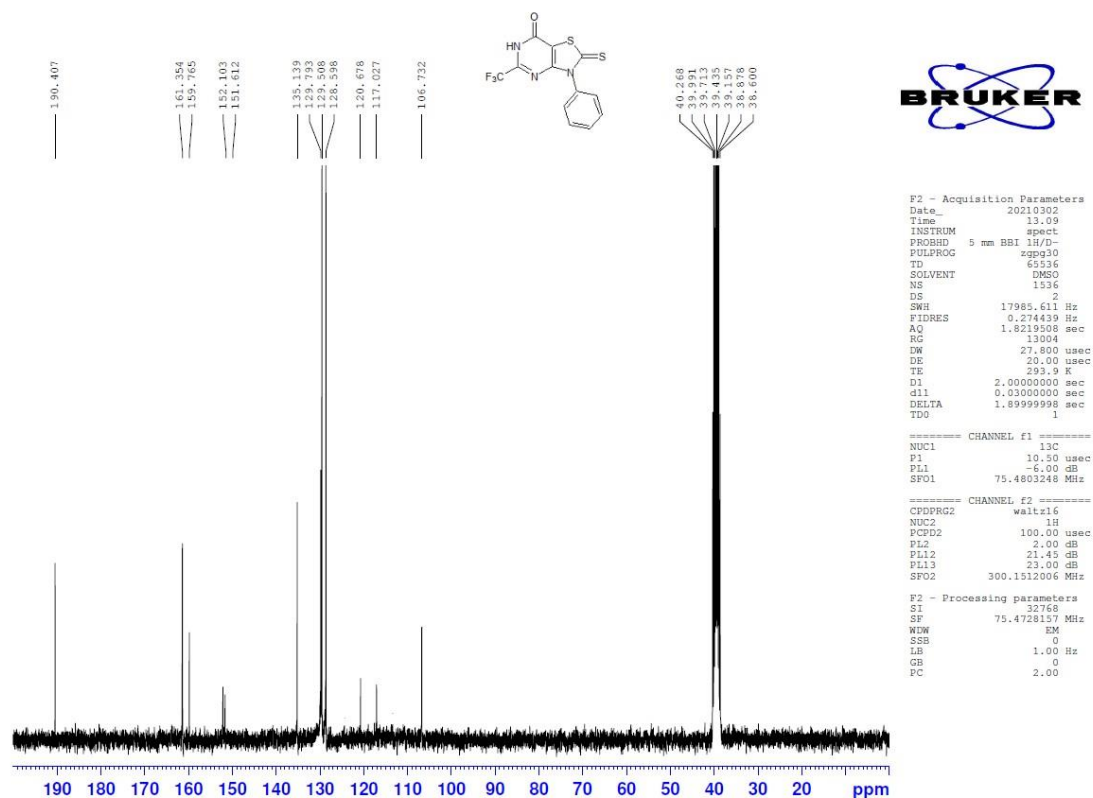

Figure S17. <sup>13</sup>CNMR spectrum of compound **2b** (75MHz, DMSO).

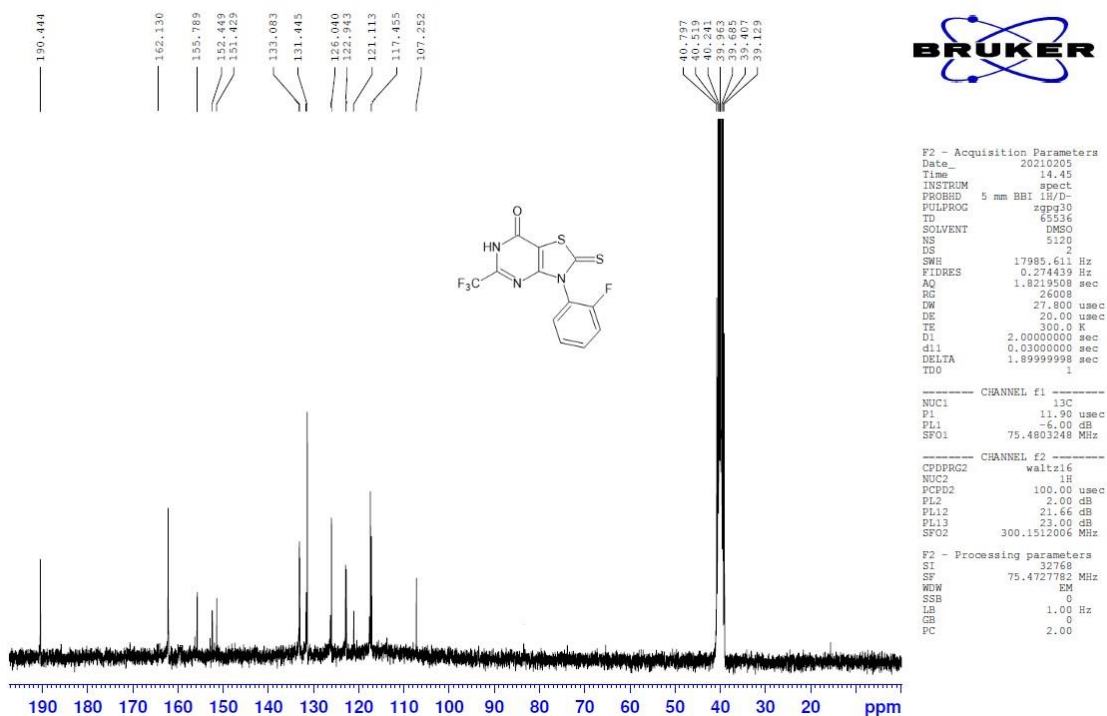

Figure S18. <sup>13</sup>CNMR spectrum of compound **2c** (75MHz, DMSO).

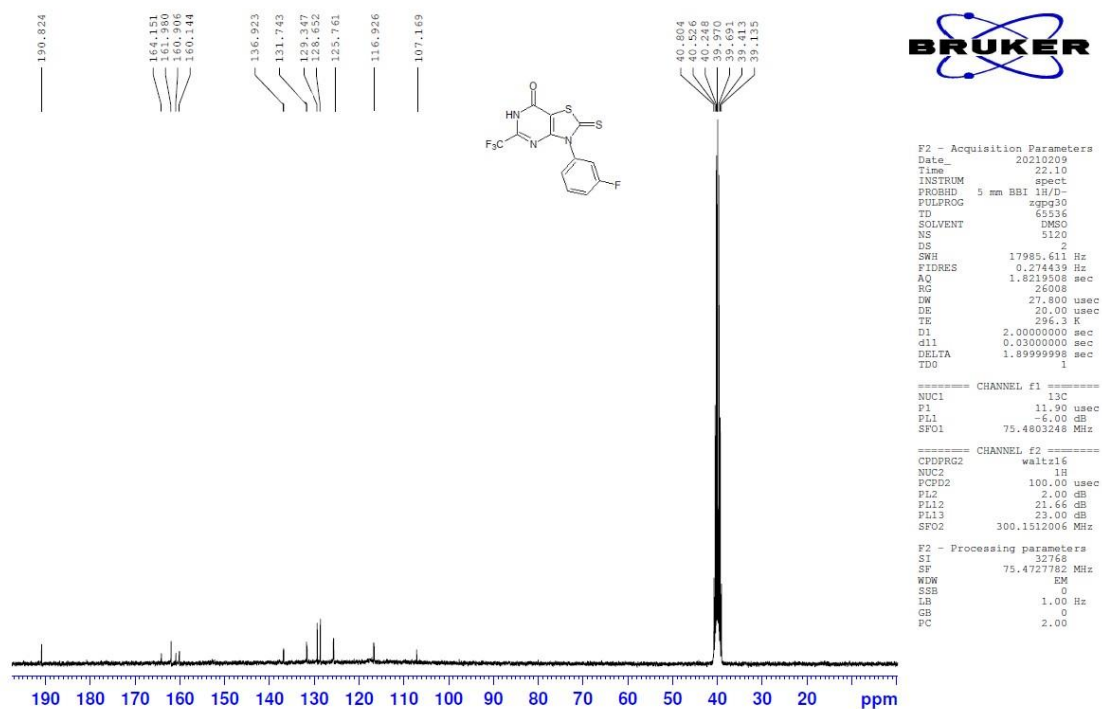

**Figure S19.**  $^{13}\text{C}$ NMR spectrum of compound **2d** (75MHz, DMSO).

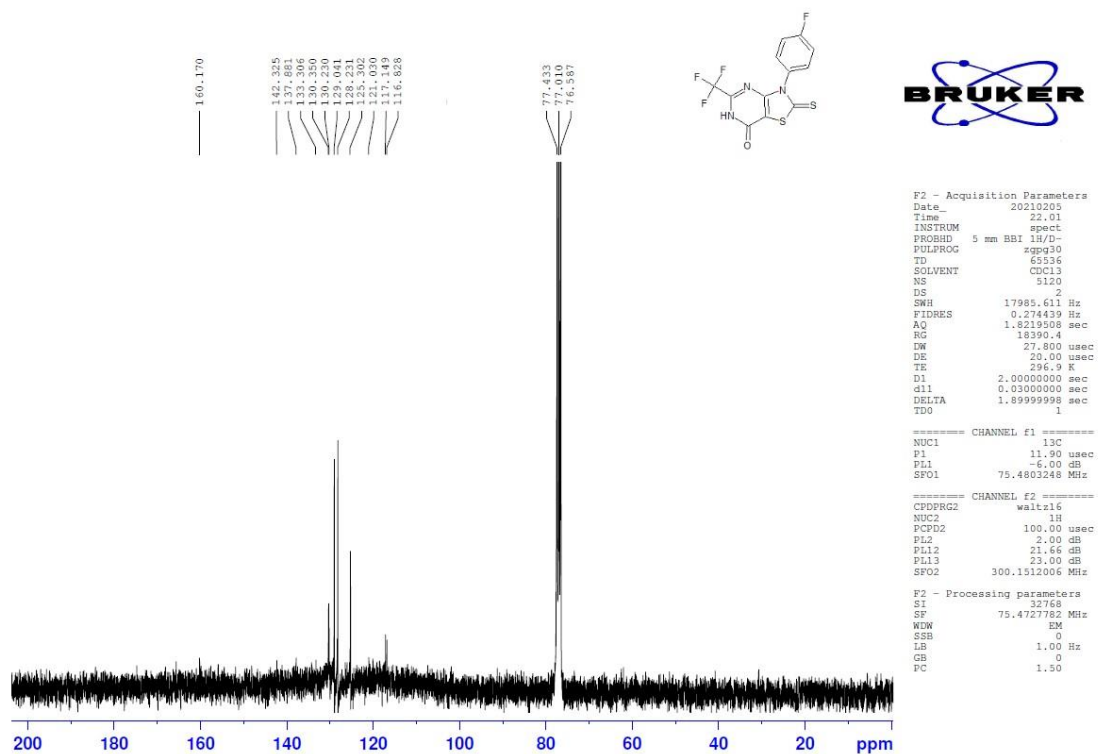

**Figure S20.**  $^{13}\text{C}$ NMR spectrum of compound **2e** (75MHz,  $\text{CDCl}_3$ ).

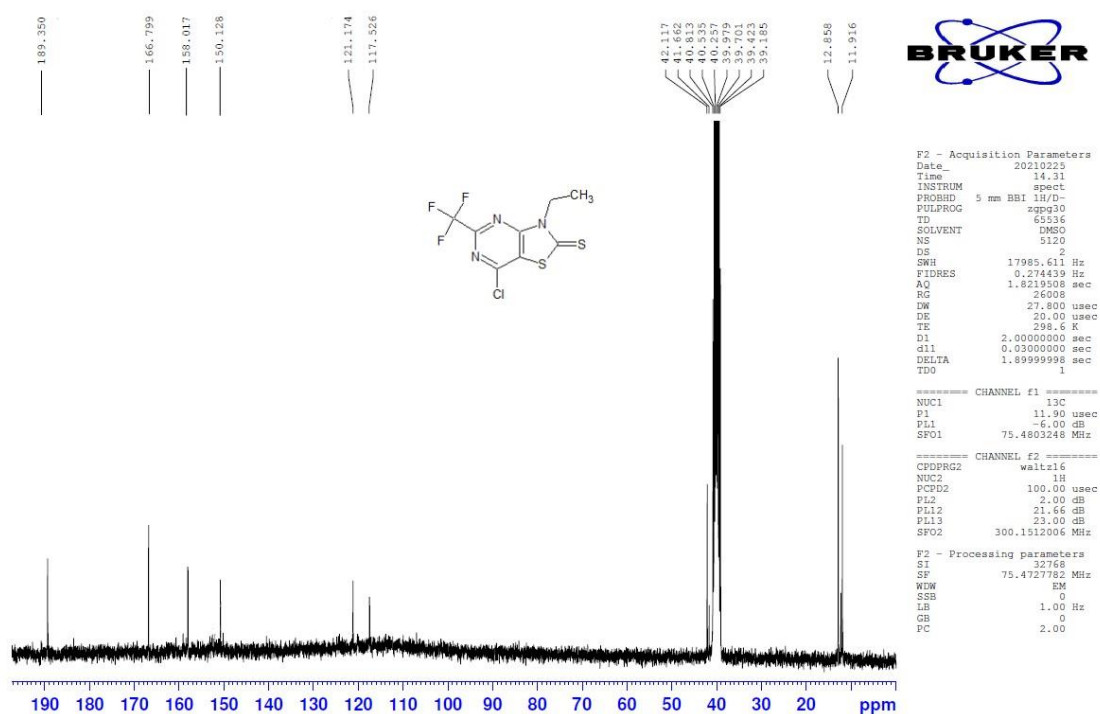

Figure S21. <sup>13</sup>CNMR spectrum of compound 3a (75MHz, DMSO).

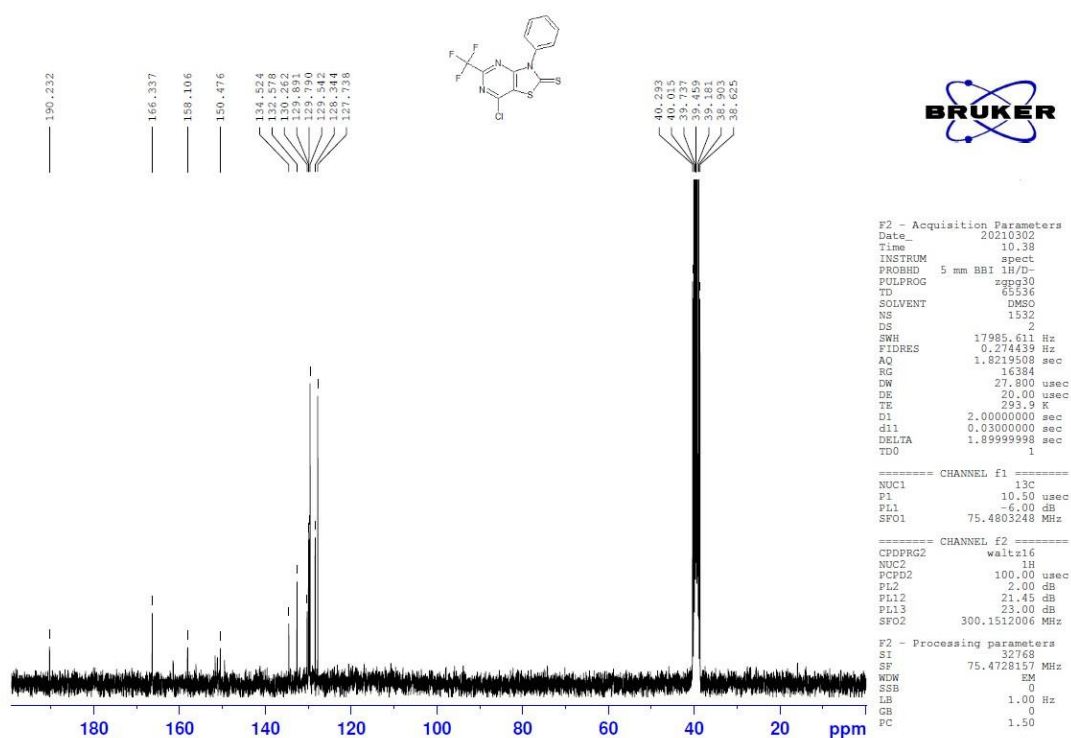

Figure S22. <sup>13</sup>CNMR spectrum of compound 3b (75MHz, DMSO).

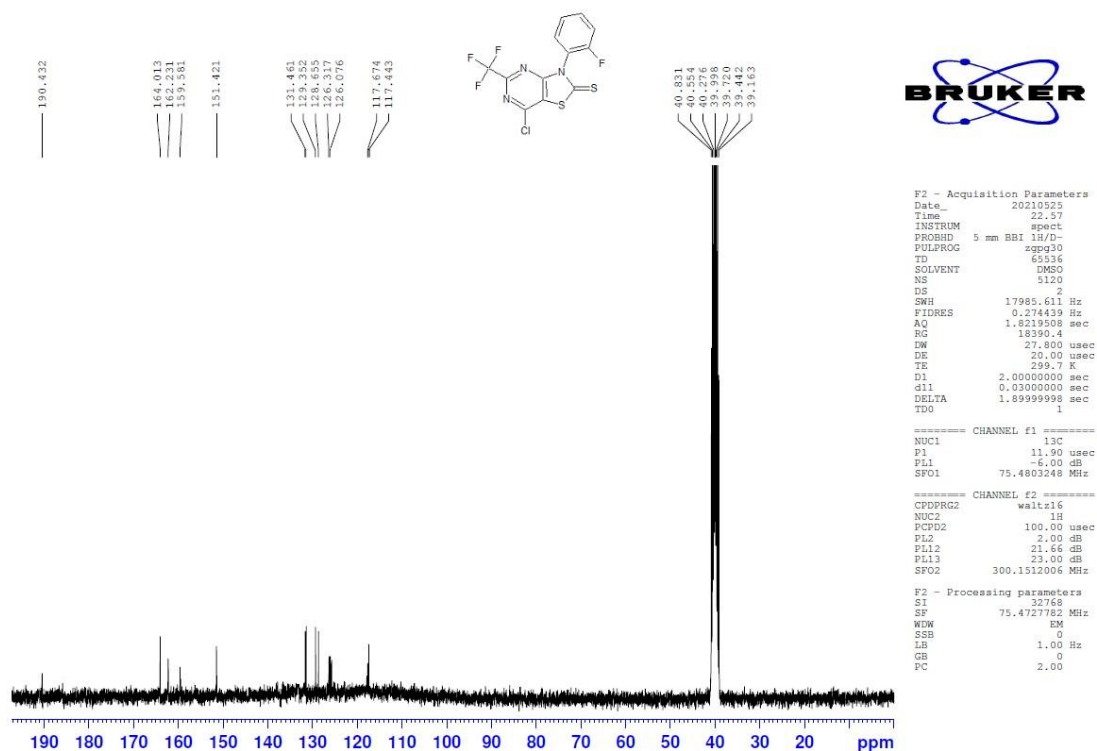

Figure S23.  $^{13}\text{C}$ NMR spectrum of compound **3c** (75MHz, DMSO).

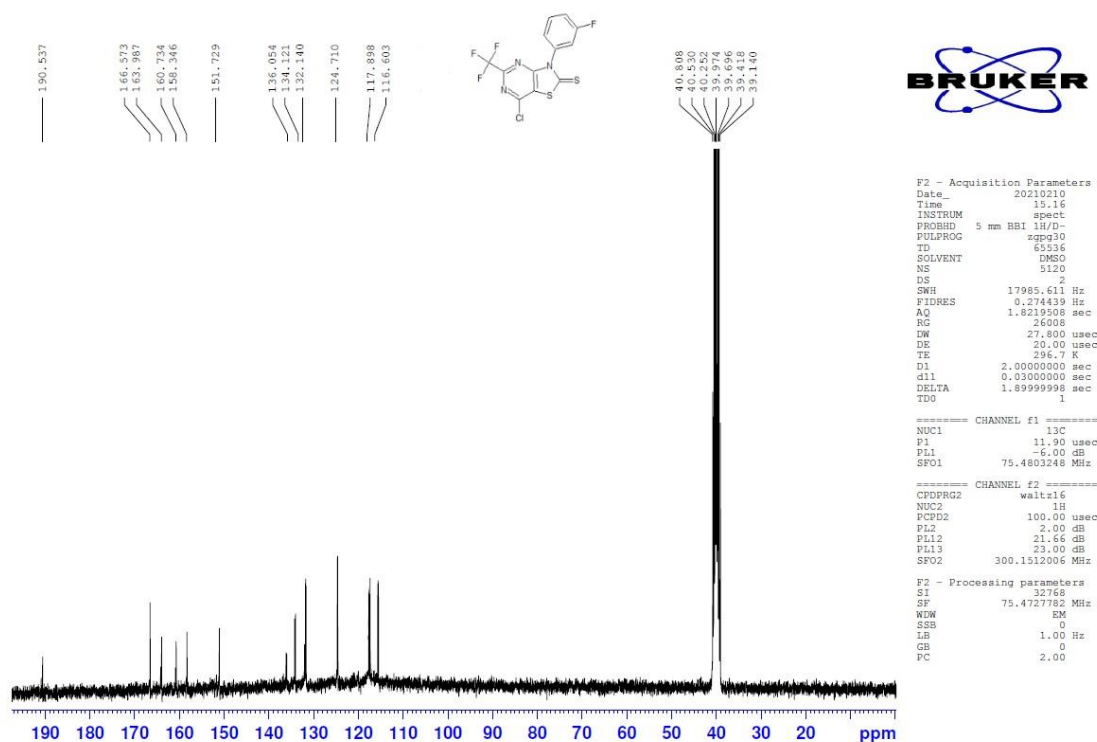

Figure S24.  $^{13}\text{C}$ NMR spectrum of compound **3d** (75MHz, DMSO).

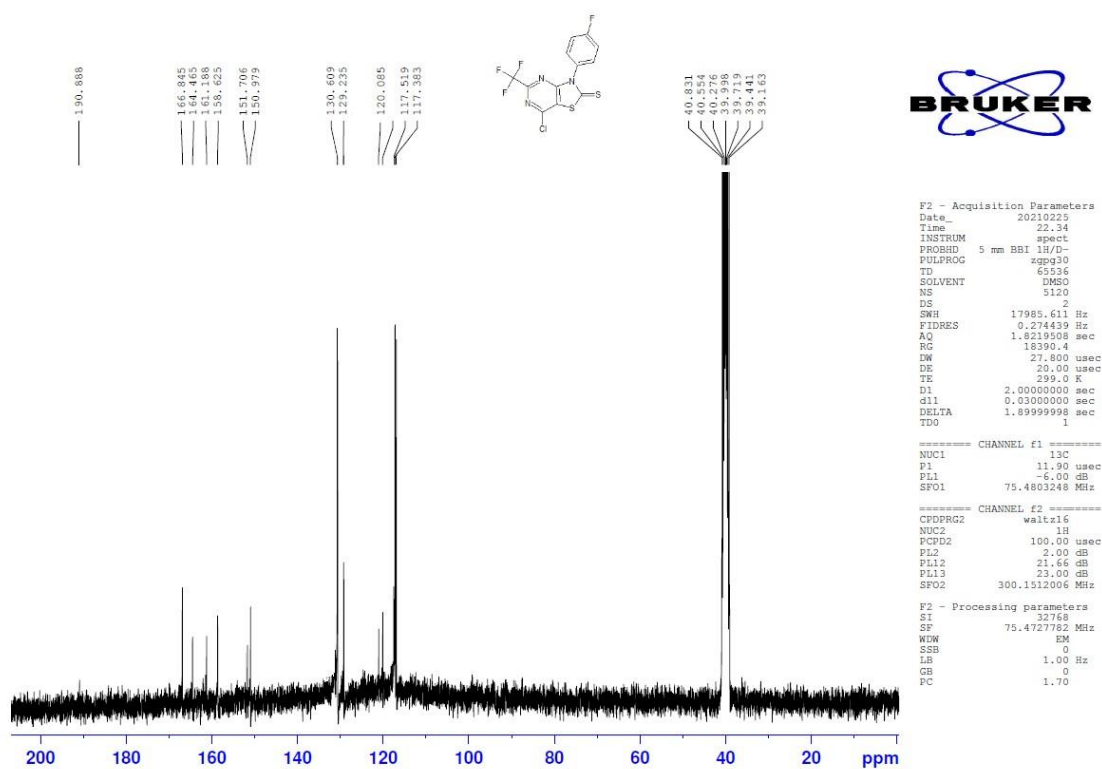

Figure S25.  $^{13}\text{C}$ NMR spectrum of compound **3e** (75MHz, DMSO).

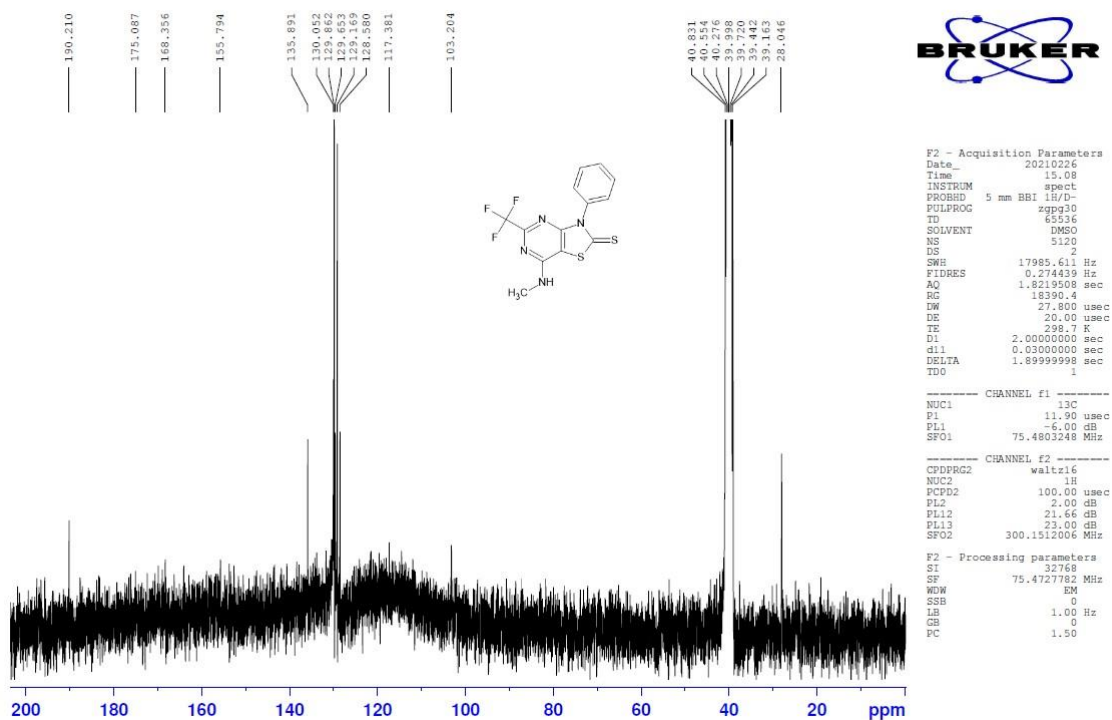

Figure S26.  $^{13}\text{C}$ NMR spectrum of compound **4a** (75MHz, DMSO).



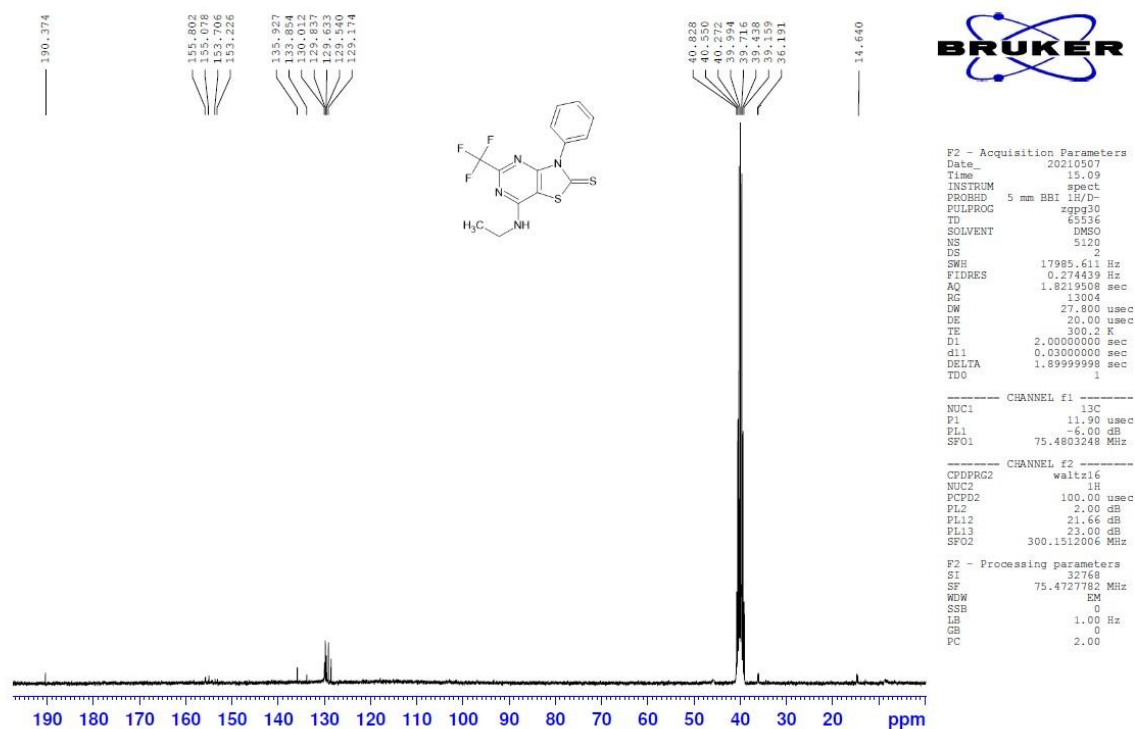

Figure S27.  $^{13}\text{C}$ NMR spectrum of compound **4b** (75MHz, DMSO).

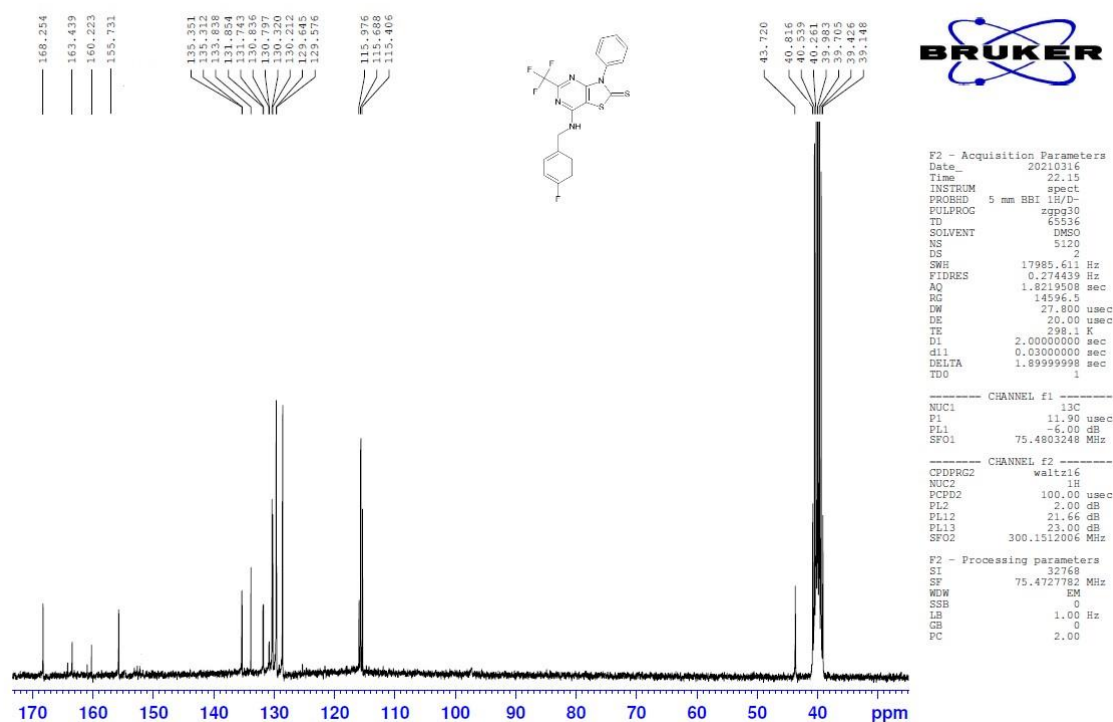

Figure S28.  $^{13}\text{C}$ NMR spectrum of compound **4c** (75MHz, DMSO).

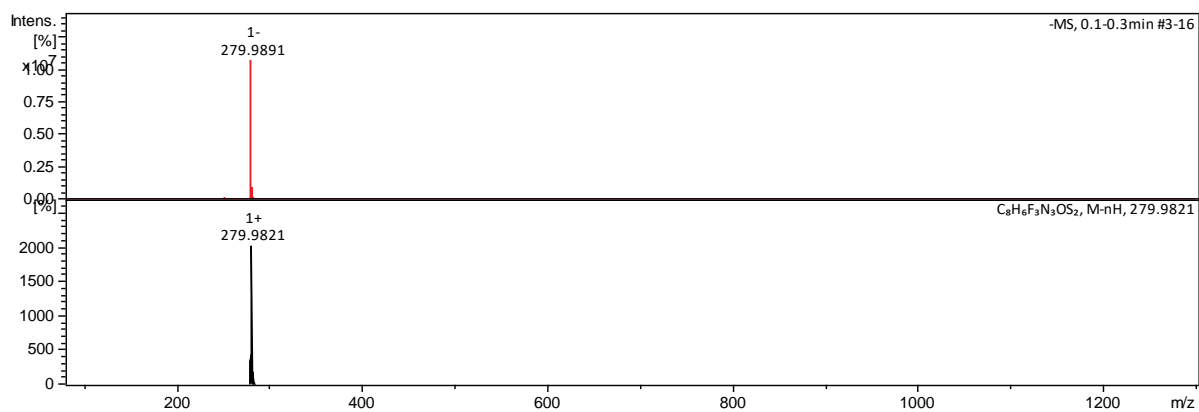

**Figure S29.** MS spectrum of compound 2a.

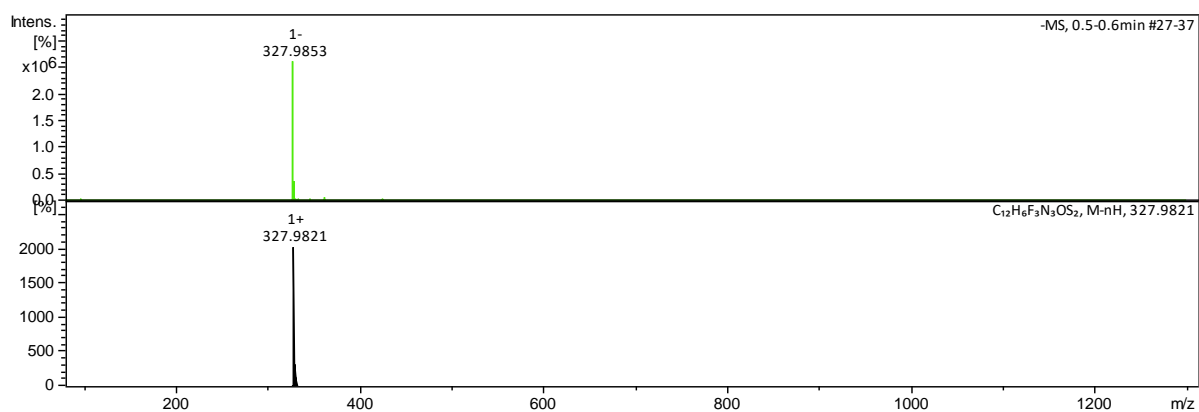

**Figure S30.** MS spectrum of compound 2b.

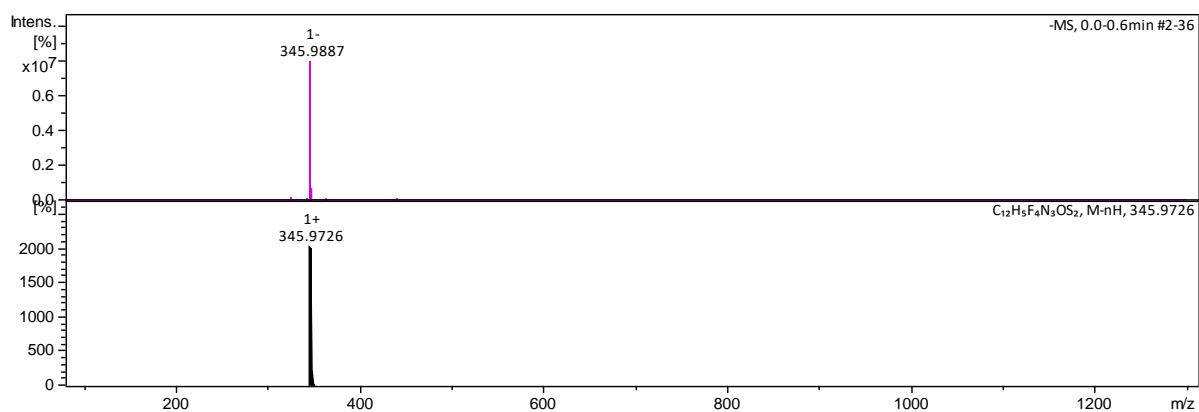

**Figure S31.** MS spectrum of compound 2c.



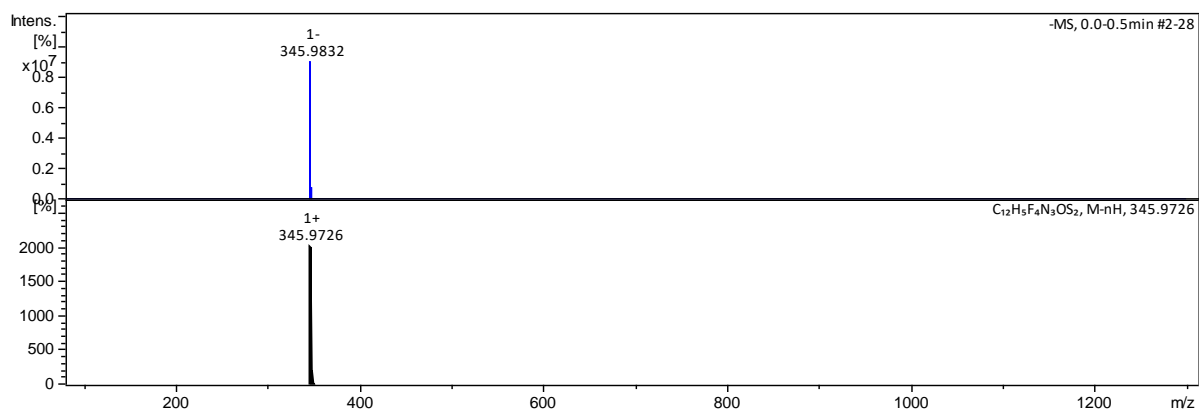

**Figure S32.** MS spectrum of compound 2d.

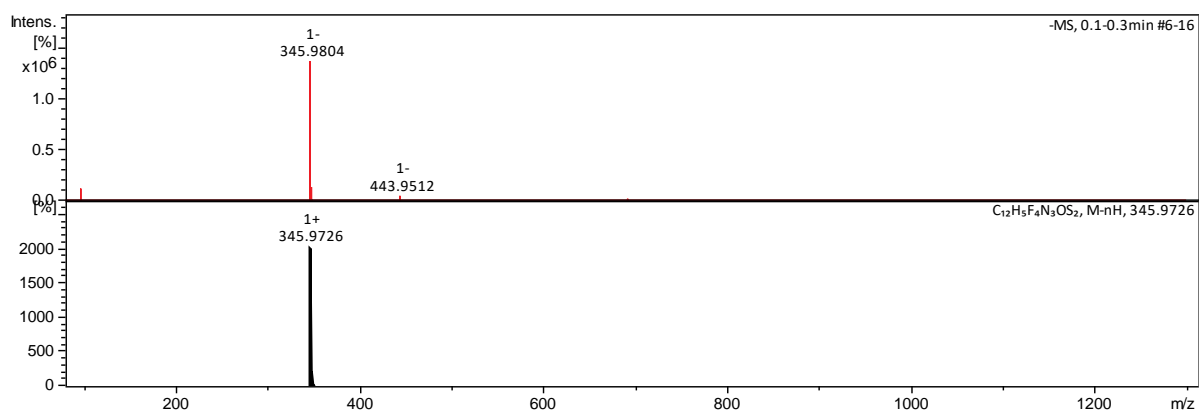

**Figure S33.** MS spectrum of compound 2e.

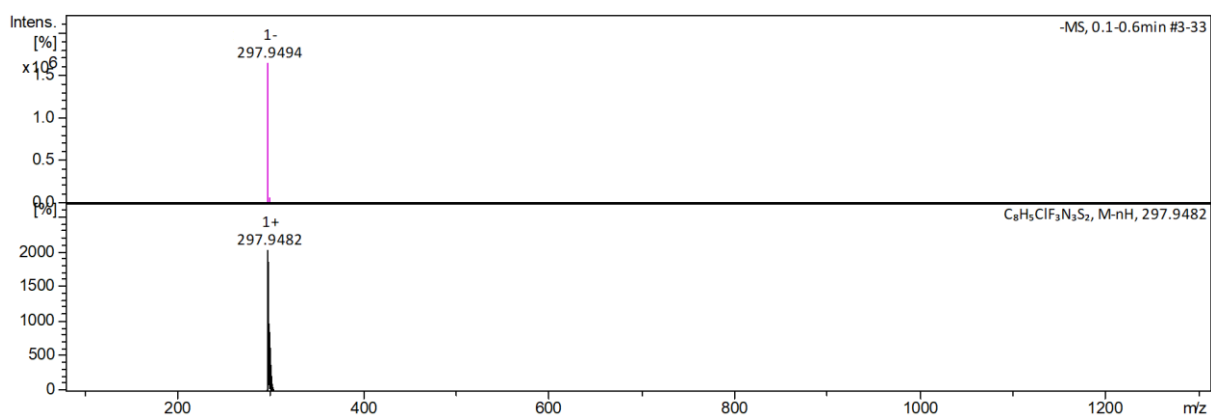

**Figure S34.** MS spectrum of compound 3a.

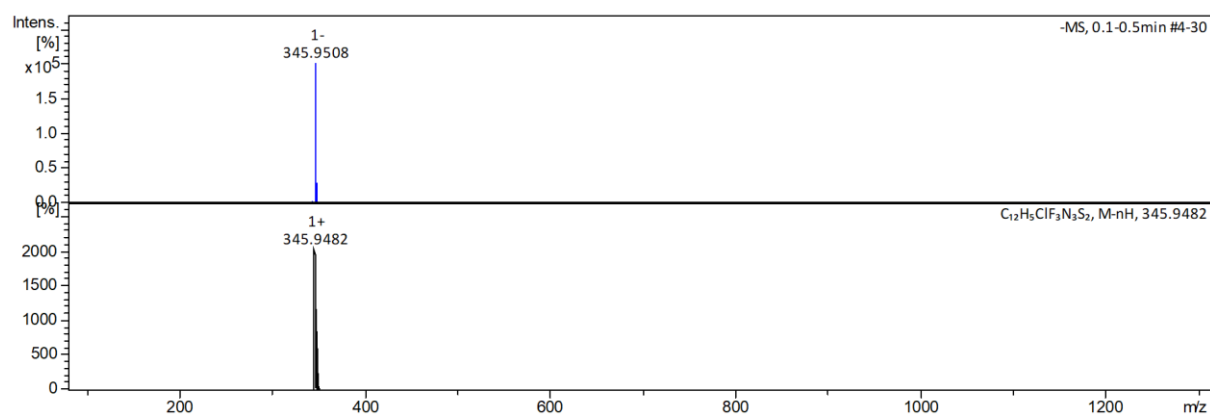

**Figure S35.** MS spectrum of compound 3b.

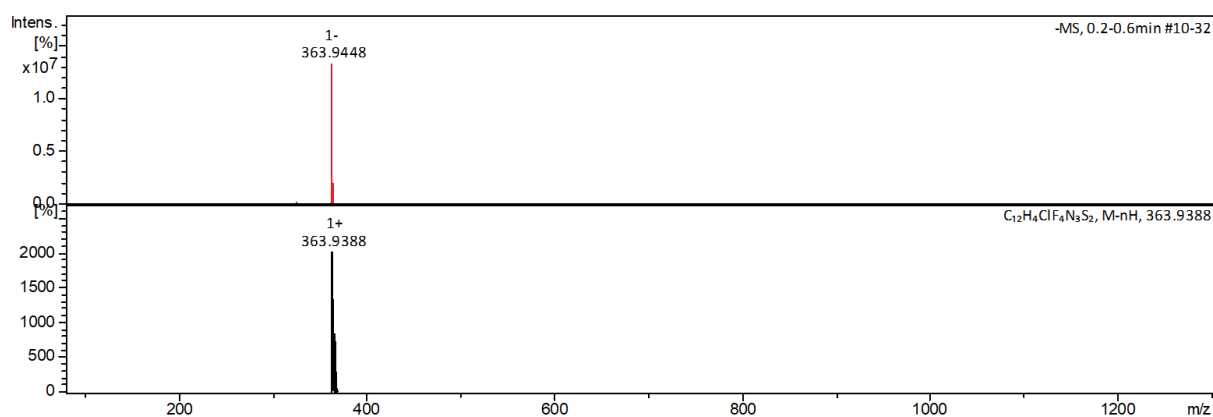

**Figure S36.** MS spectrum of compound 3c.

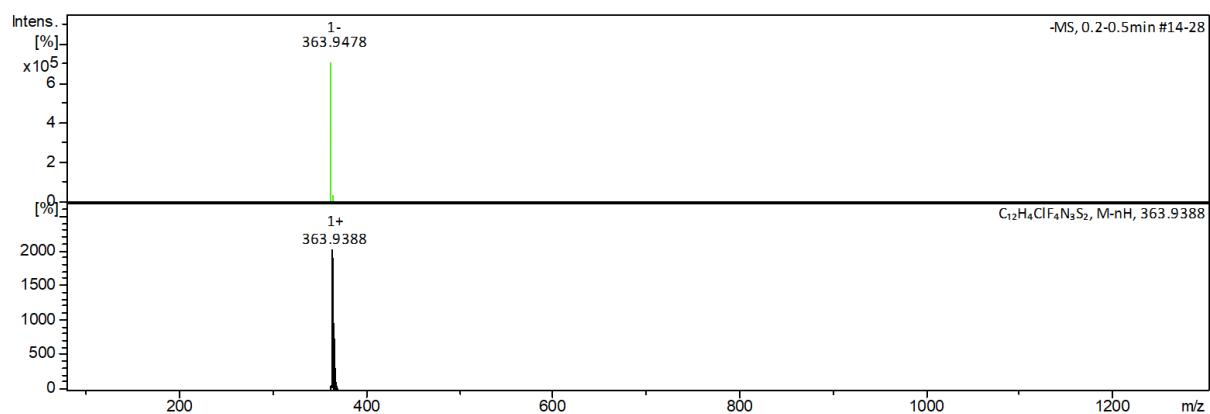

**Figure S37.** MS spectrum of compound 3d.

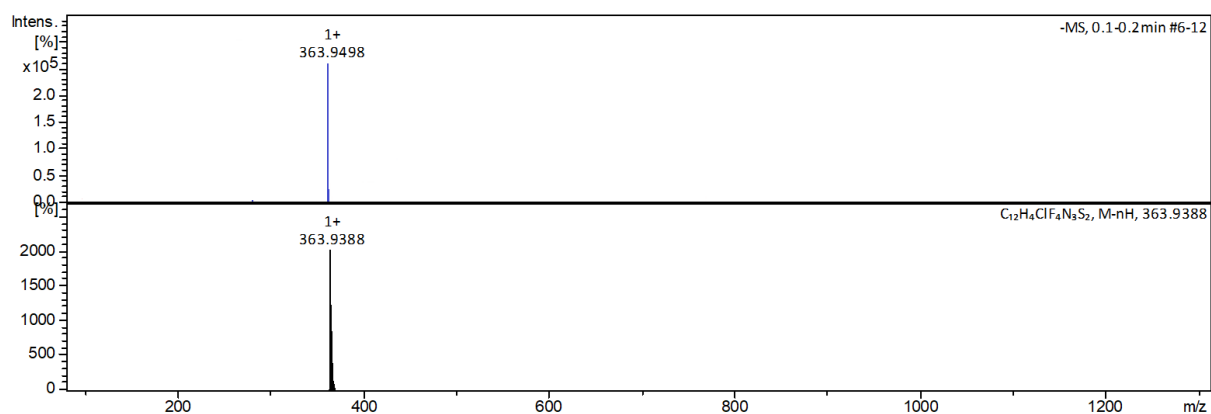

**Figure S38.** MS spectrum of compound 3e.

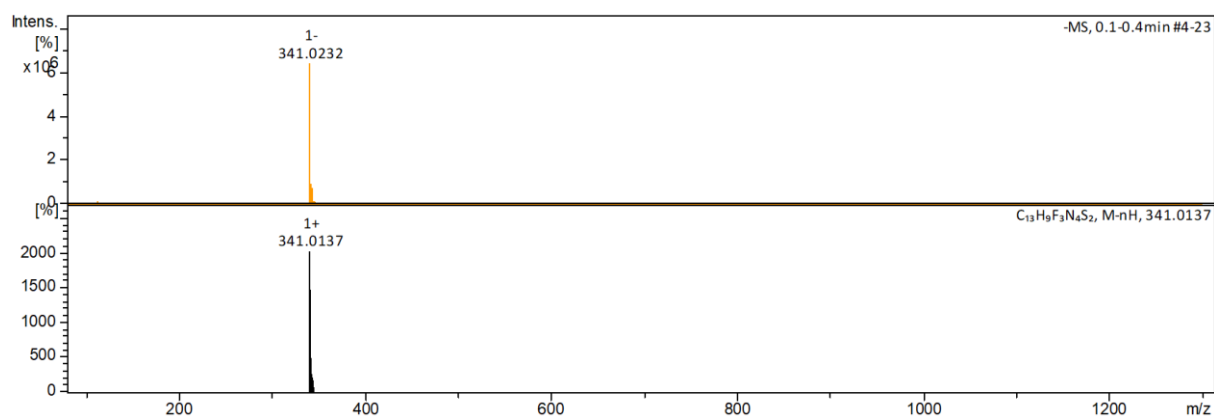

**Figure S39.** MS spectrum of compound 4a.

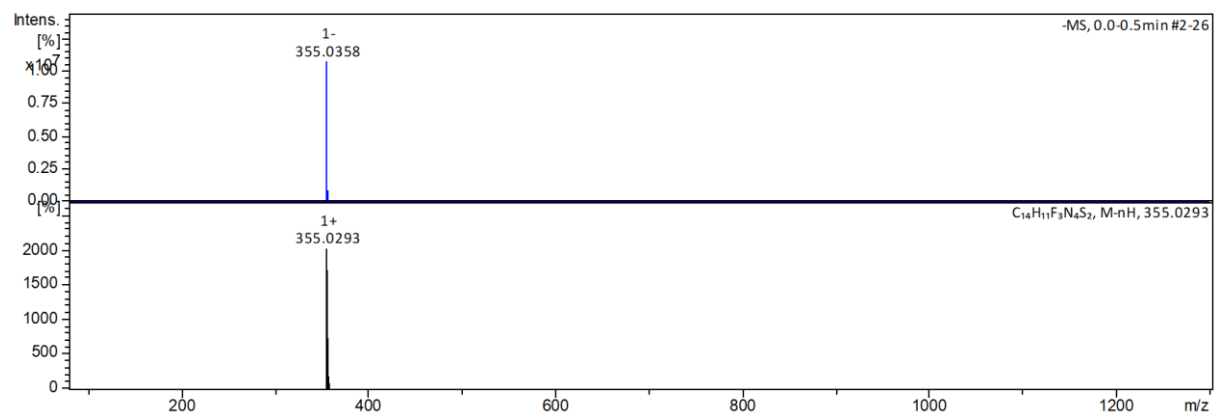

**Figure S40.** MS spectrum of compound 4b.

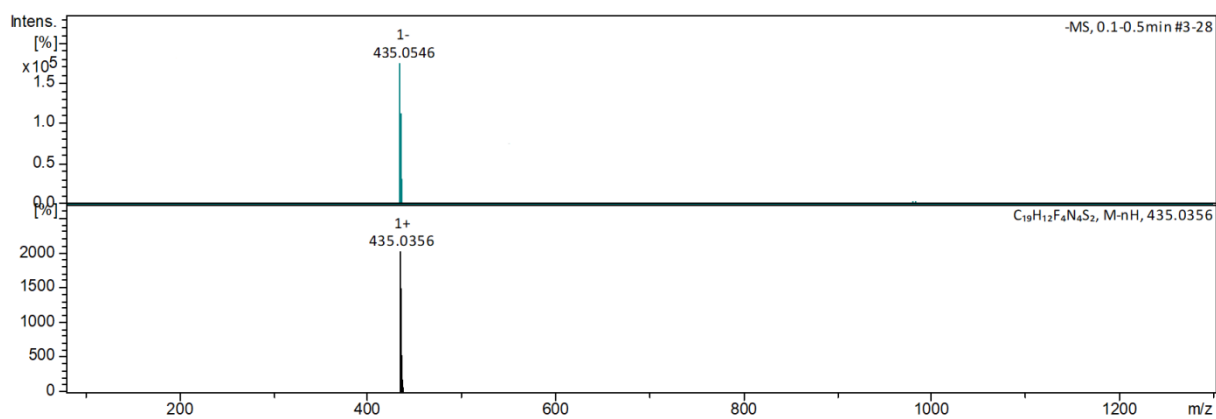

Figure S41. MS spectrum of compound 4c.

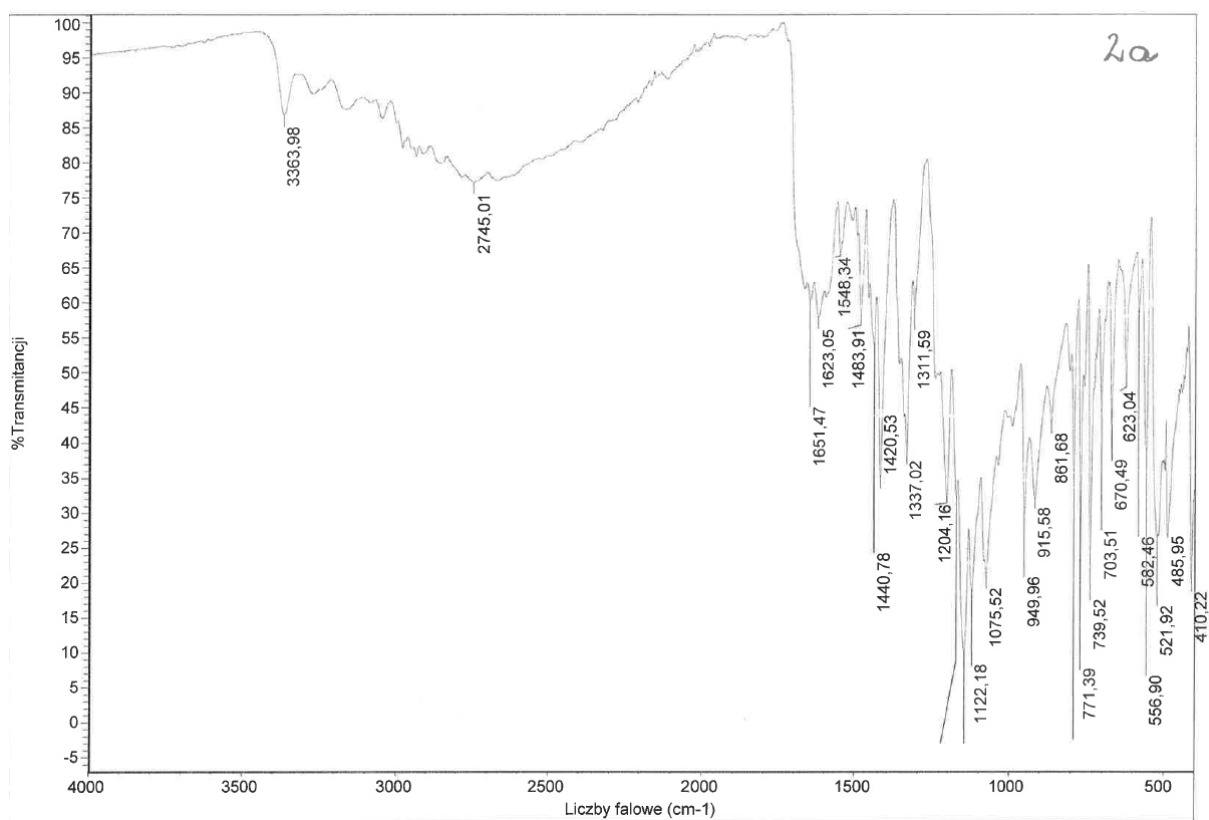

Figure S42. IR spectrum of compound 2a.

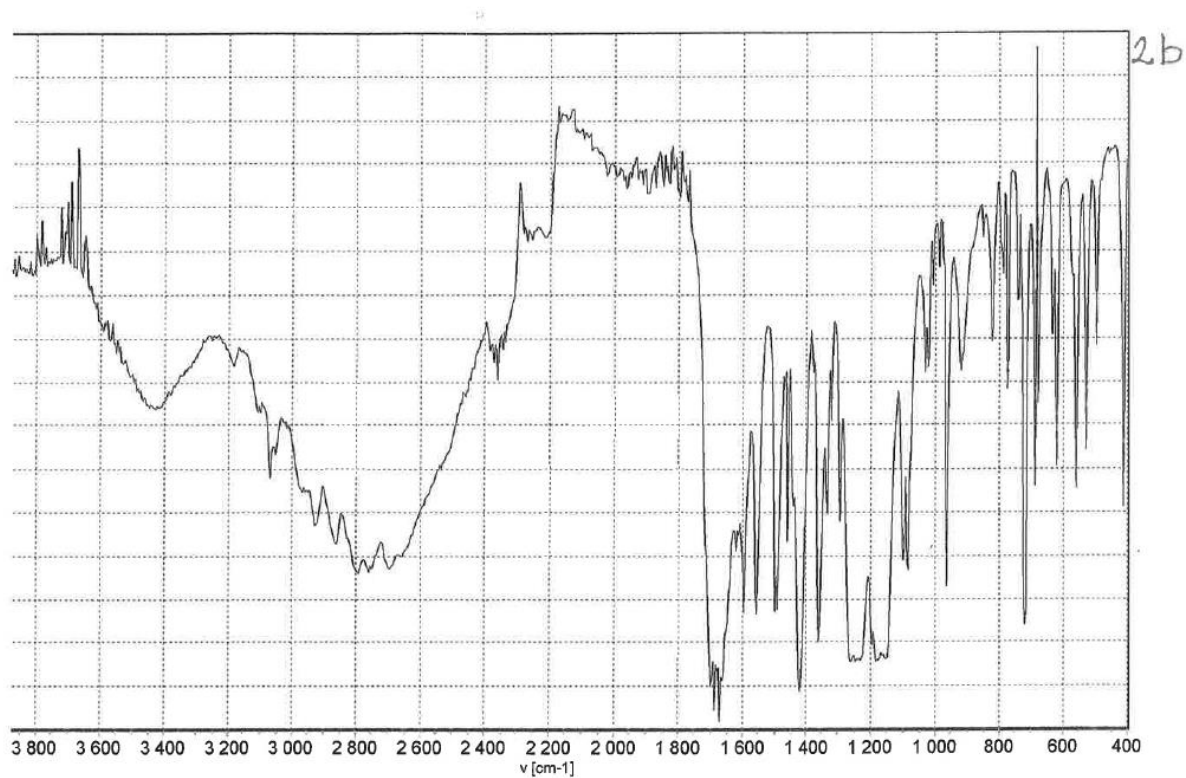

Figure S43. IR spectrum of compound 2b.

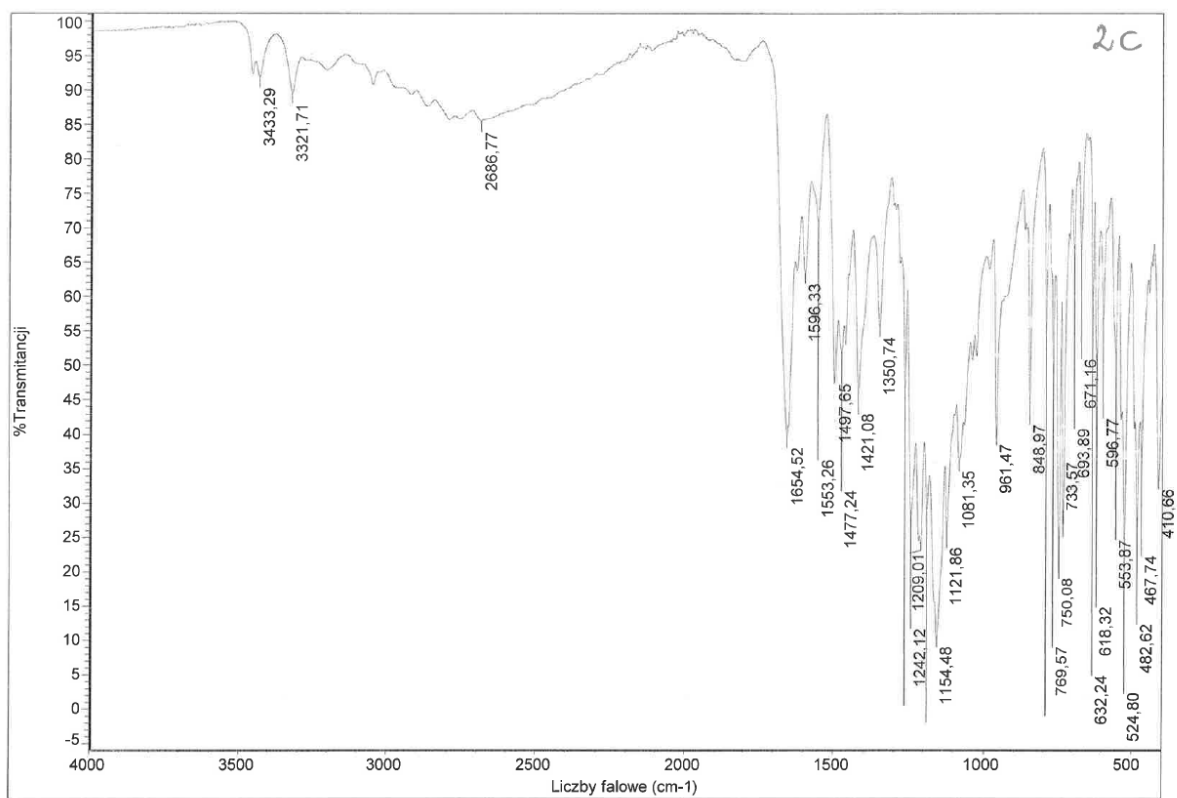

Figure S44. IR spectrum of compound 2c.

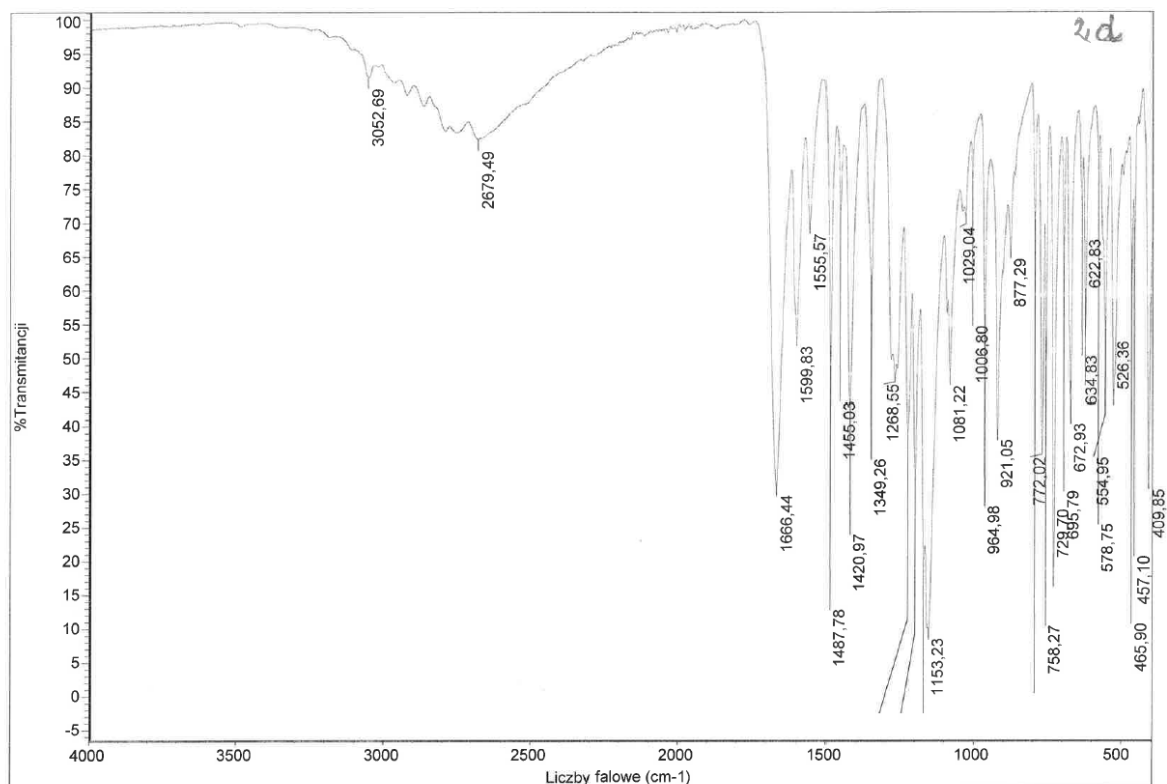

**Figure S45.** IR spectrum of compound **2d**.

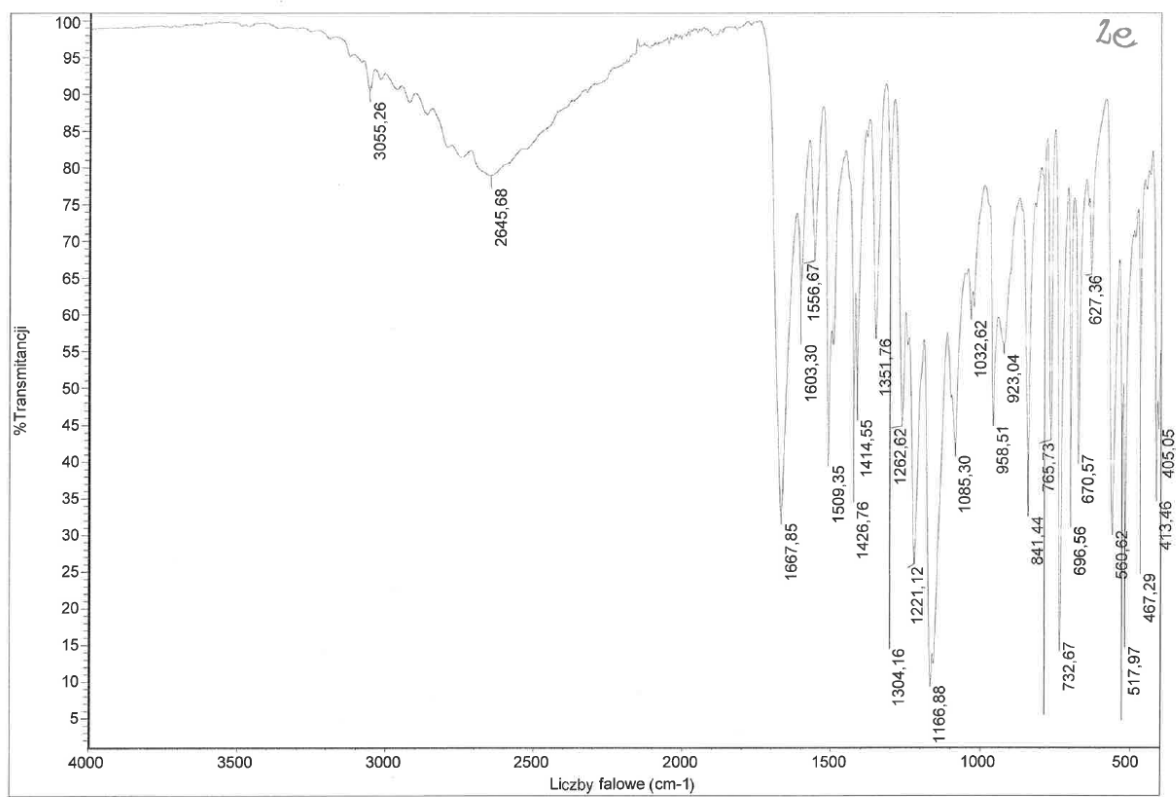

**Figure S46.** IR spectrum of compound **2e**.

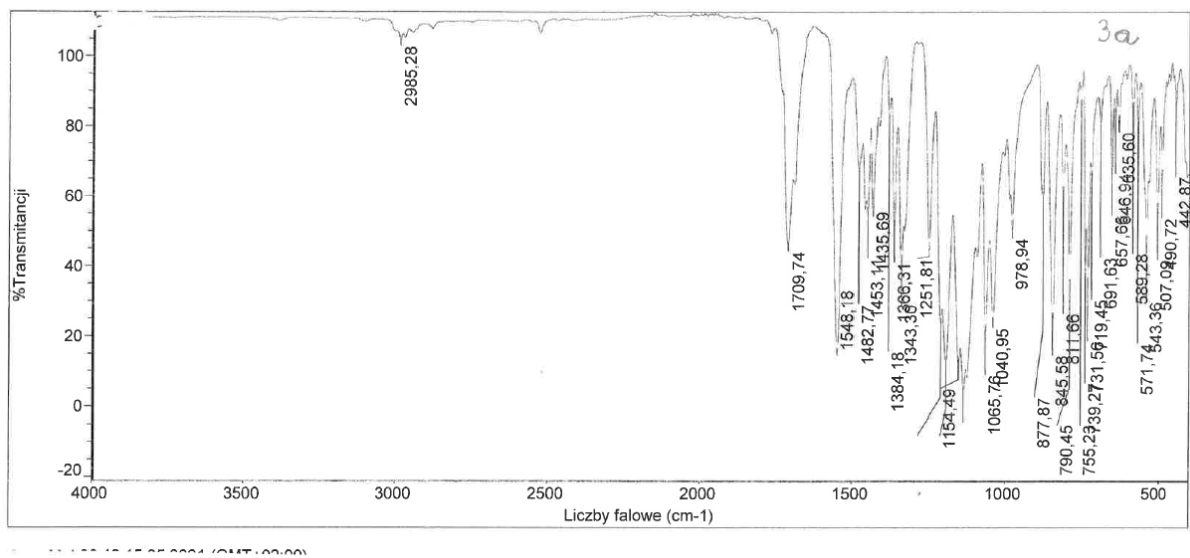

Figure S47. IR spectrum of compound 3a.

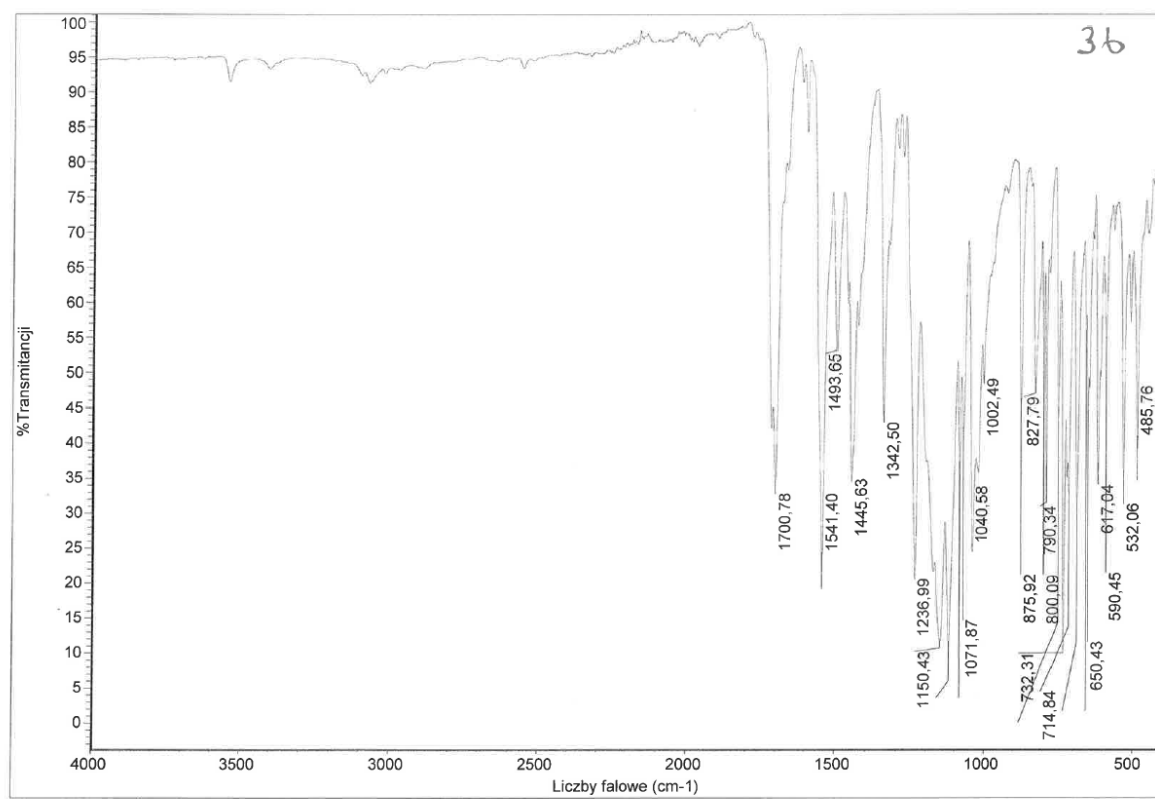

Figure S48. IR spectrum of compound 3b.

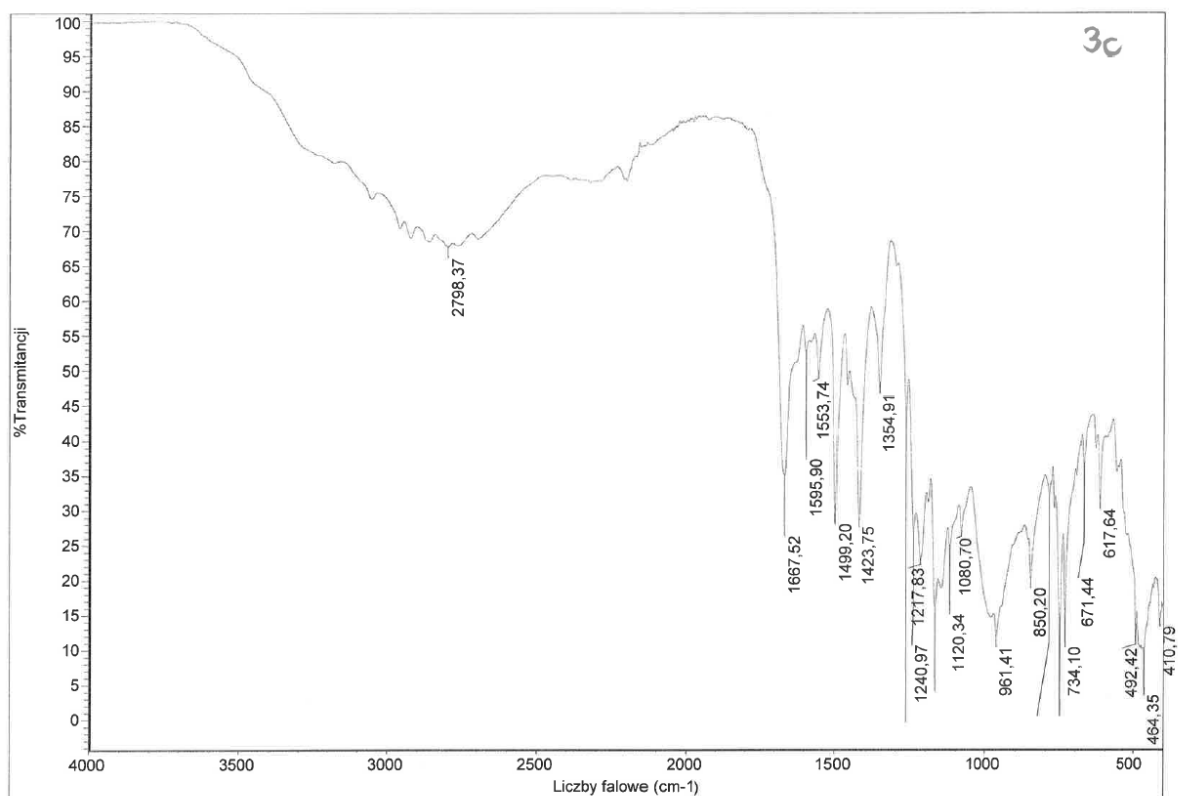

Figure S49. IR spectrum of compound 3c.

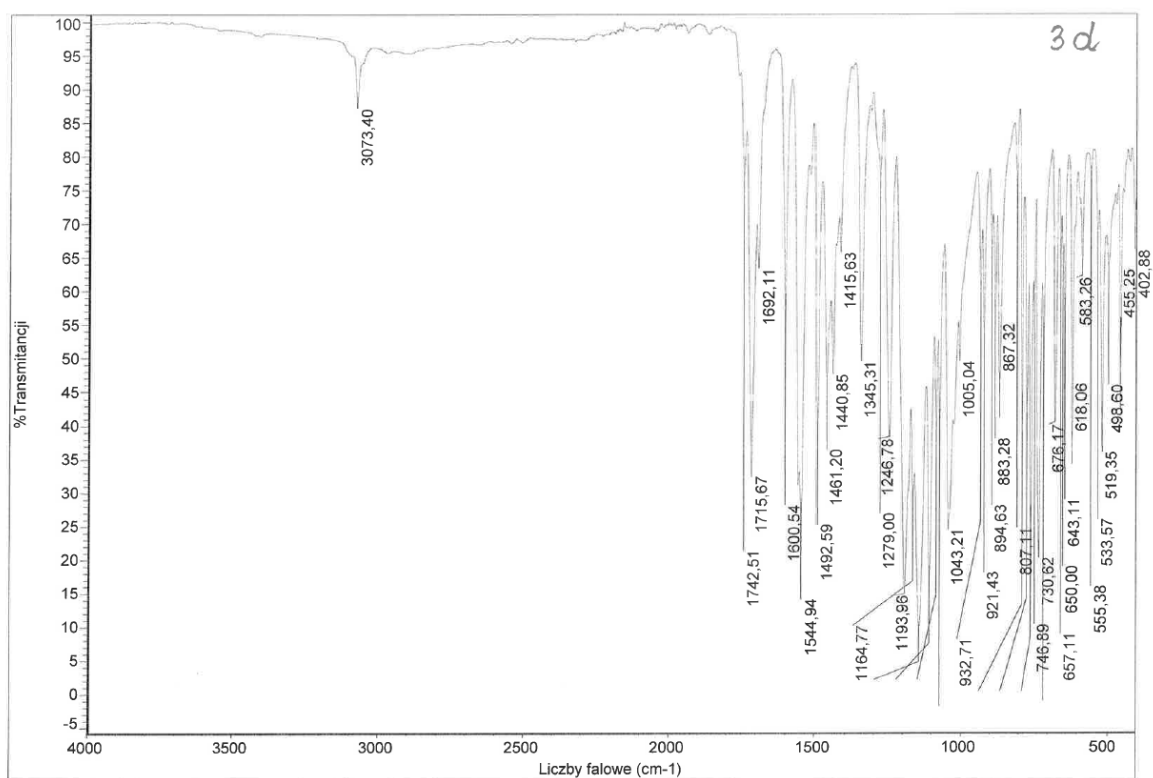

Figure S50. IR spectrum of compound 3d.



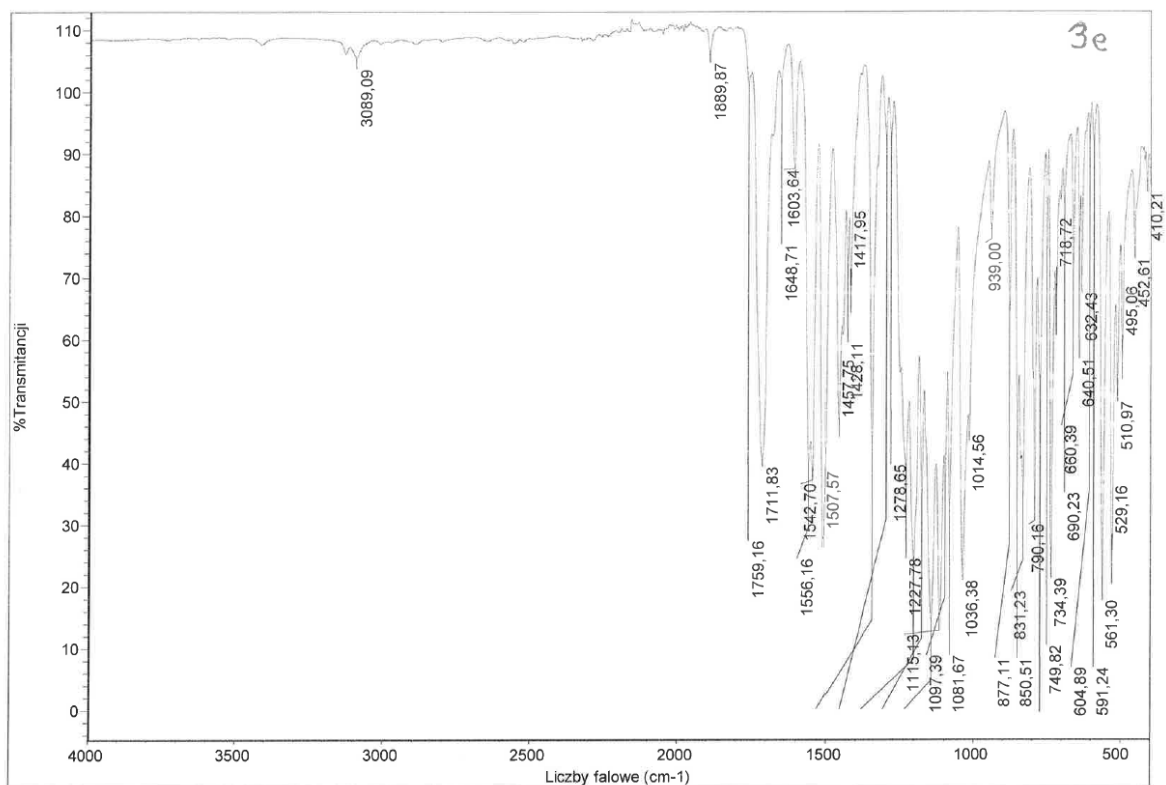

**Figure S51.** IR spectrum of compound **3e**.

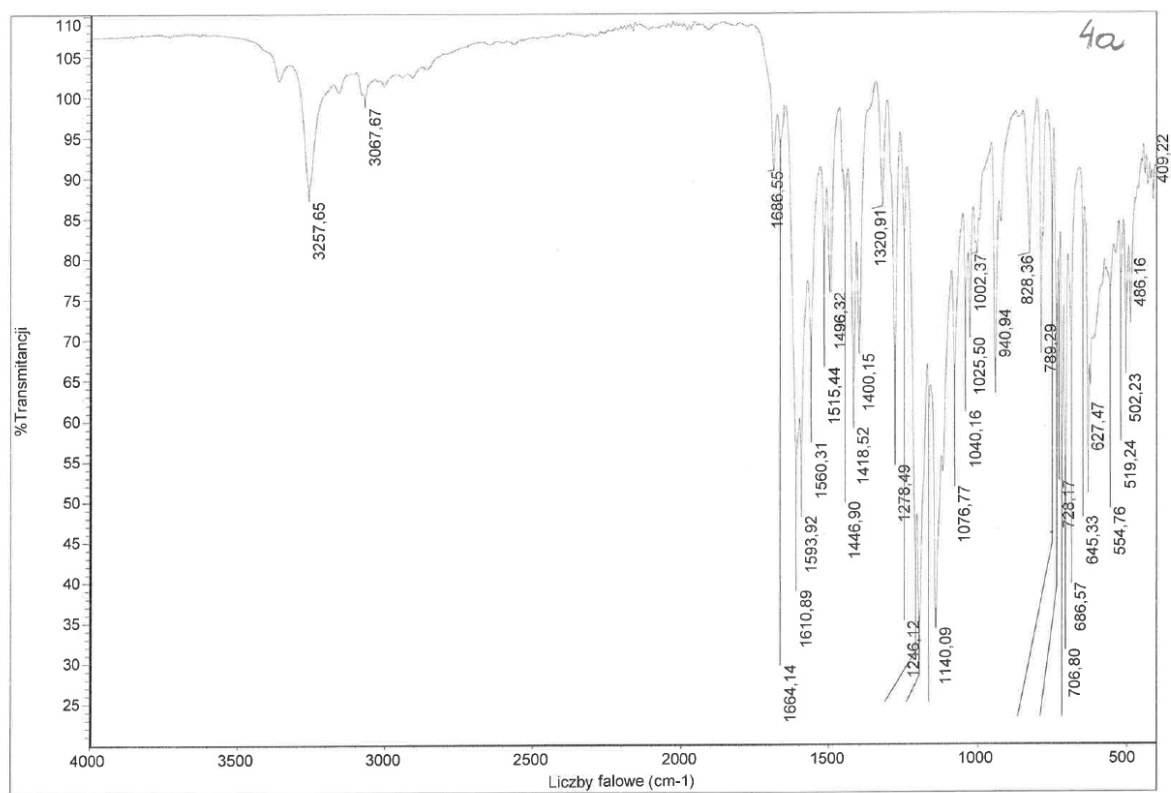

**Figure S52.** IR spectrum of compound **4a**.

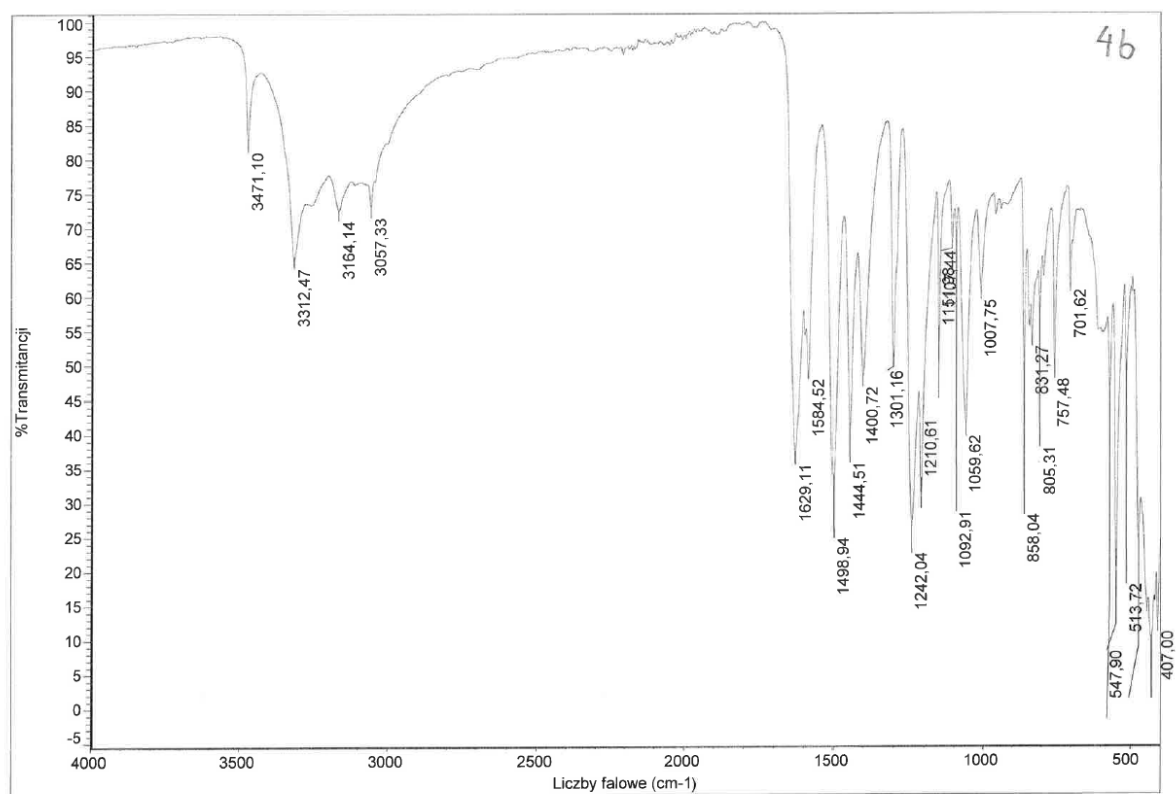

Figure S53. IR spectrum of compound 4b.

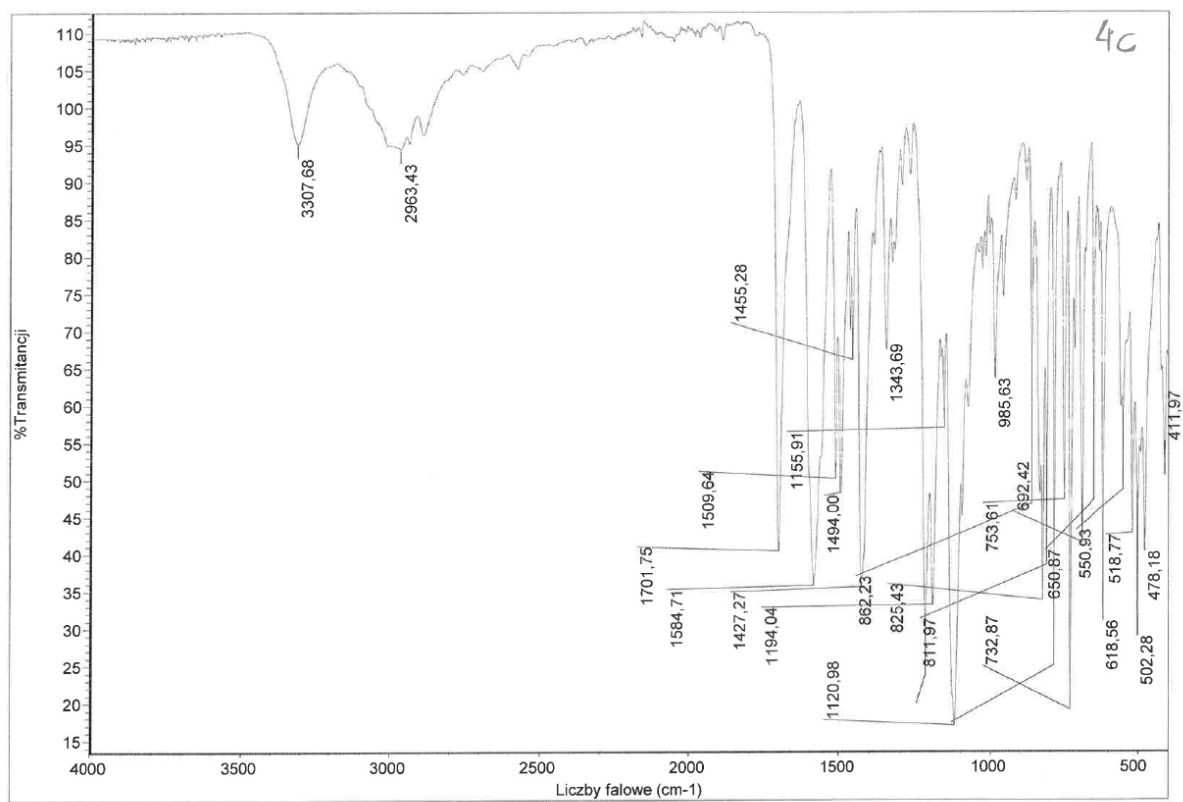

Figure S54. IR spectrum of compound 4c.

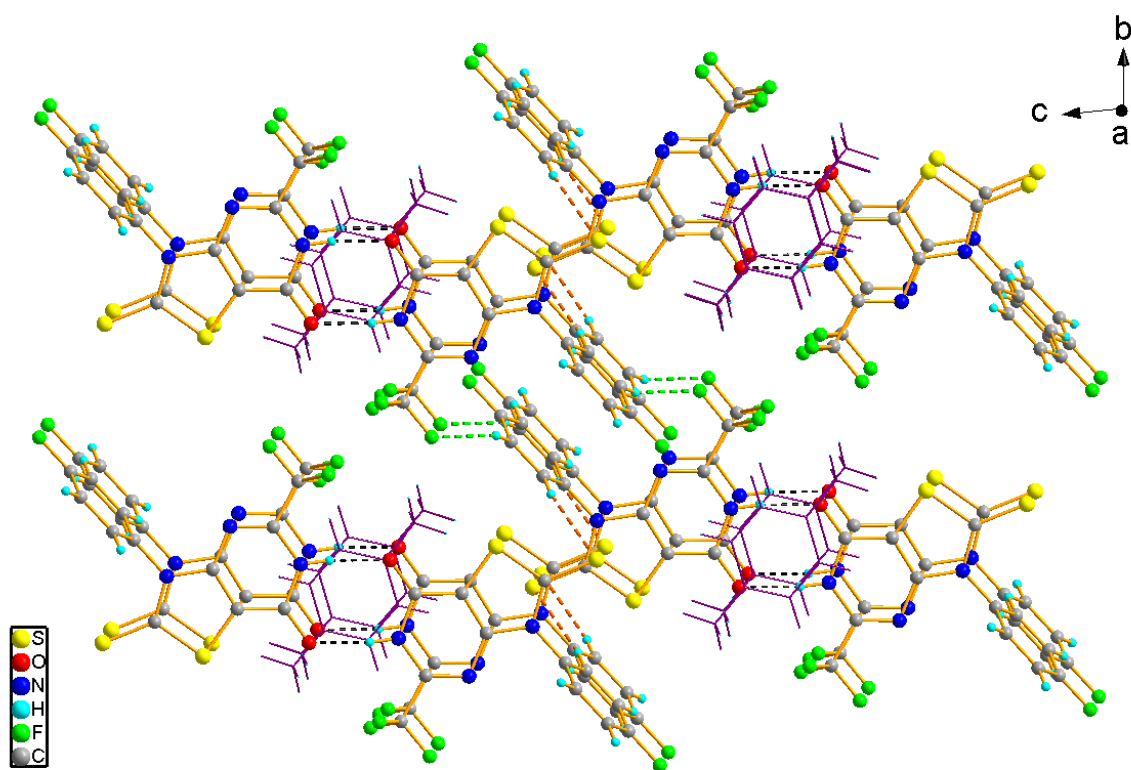

**Figure S55.** The crystal packing of the **2e** viewed along *a* axis. Disordered toluene molecules are marked with a purple wire/stick model. Dashed lines (in black) indicate intermolecular interactions, with N—H $\cdots$ O in black, C—H $\cdots$ S in orange and C—H $\cdots$ F in light green.

**Table S1.** Selected X-ray single-crystal data and structure refinement details of compounds **2e** and **4b**.

|                                                                                            | <b>2e</b>                                                                                                       | <b>4b</b>                                                                    |
|--------------------------------------------------------------------------------------------|-----------------------------------------------------------------------------------------------------------------|------------------------------------------------------------------------------|
| Chemical formula                                                                           | 2(C <sub>12</sub> H <sub>5</sub> F <sub>4</sub> N <sub>3</sub> OS <sub>2</sub> ), C <sub>7</sub> H <sub>8</sub> | C <sub>14</sub> H <sub>11</sub> F <sub>3</sub> N <sub>4</sub> S <sub>2</sub> |
| <i>M<sub>r</sub></i> (g/mol)                                                               | 786.75                                                                                                          | 356.39                                                                       |
| Crystal system, space group                                                                | triclinic, <i>P</i> -1                                                                                          | monoclinic, <i>P</i> 2 <sub>1</sub> / <i>n</i>                               |
| Temperature (K)                                                                            | 100                                                                                                             | 100                                                                          |
| <i>a</i> , <i>b</i> , <i>c</i> (Å)                                                         | 7.217 (2), 9.362 (3), 12.381 (3)                                                                                | 16.228(4), 5.599(2), 17.631(4)                                               |
| <i>α</i> , <i>β</i> , <i>γ</i> (°)                                                         | 95.81 (2), 90.55 (2), 99.02 (2)                                                                                 | 90, 111.050(5), 90                                                           |
| <i>V</i> (Å <sup>3</sup> )                                                                 | 347.46 (17)                                                                                                     | 1495.1(7)                                                                    |
| <i>Z</i>                                                                                   | 1                                                                                                               | 4                                                                            |
| <i>λ</i> (Å)                                                                               | 1.54184                                                                                                         | 1.54184                                                                      |
| Crystal size (mm)                                                                          | 0.190 x 0.125 x 0.041                                                                                           | 0.207 × 0.034 × 0.021                                                        |
| Crystal colour, shape                                                                      | yellow, plate                                                                                                   | light yellow, needle                                                         |
| <i>D<sub>calc</sub></i> (g/cm <sup>3</sup> )                                               | 1.590                                                                                                           | 1.583                                                                        |
| <i>μ</i> (mm <sup>-1</sup> )                                                               | 3.45                                                                                                            | 3.58                                                                         |
| <i>F</i> (000)                                                                             | 398                                                                                                             | 728                                                                          |
| 2 <i>θ</i> range (°)                                                                       | 3.6 - 75.7                                                                                                      | 3.2-75.5                                                                     |
| No of measured, independent and observed [ <i>I</i> > 2 <i>σ</i> ( <i>I</i> )] reflections | 16332, 3355, 3066                                                                                               | 10153, 3044, 2463                                                            |
| <i>R<sub>int</sub></i>                                                                     | 0.030                                                                                                           | 0.085                                                                        |
| Parameters, restraints                                                                     | 336, 0                                                                                                          | 209, 0                                                                       |
| Goof on <i>F</i> <sup>2</sup>                                                              | 1.06                                                                                                            | 1.04                                                                         |
| <i>R</i> <sub>1</sub> [ <i>I</i> > 2 <i>σ</i> ( <i>I</i> )]                                | 0.039                                                                                                           | 0.075                                                                        |
| <i>wR</i> <sub>2</sub> (all data)                                                          | 0.111                                                                                                           | 0.215                                                                        |
| <i>T<sub>min</sub></i> , <i>T<sub>max</sub></i>                                            | 0.69, 1.00                                                                                                      | 0.51, 1.00                                                                   |
| <i>Δρ<sub>max</sub></i> , <i>Δρ<sub>min</sub></i> (e Å <sup>-3</sup> )                     | 0.52, -0.40                                                                                                     | 1.01, -0.66                                                                  |
| CCDC No                                                                                    | 2118584                                                                                                         | 2118585                                                                      |
